# Supplementary figures and images for: The Effect of Crystallinity on the Toughness of Cast Polyamide 6 Rods with Different Diameters
Source: MDPI journal article supplement (doi:10.3390/polym12020293), 2020-02-02

^exo

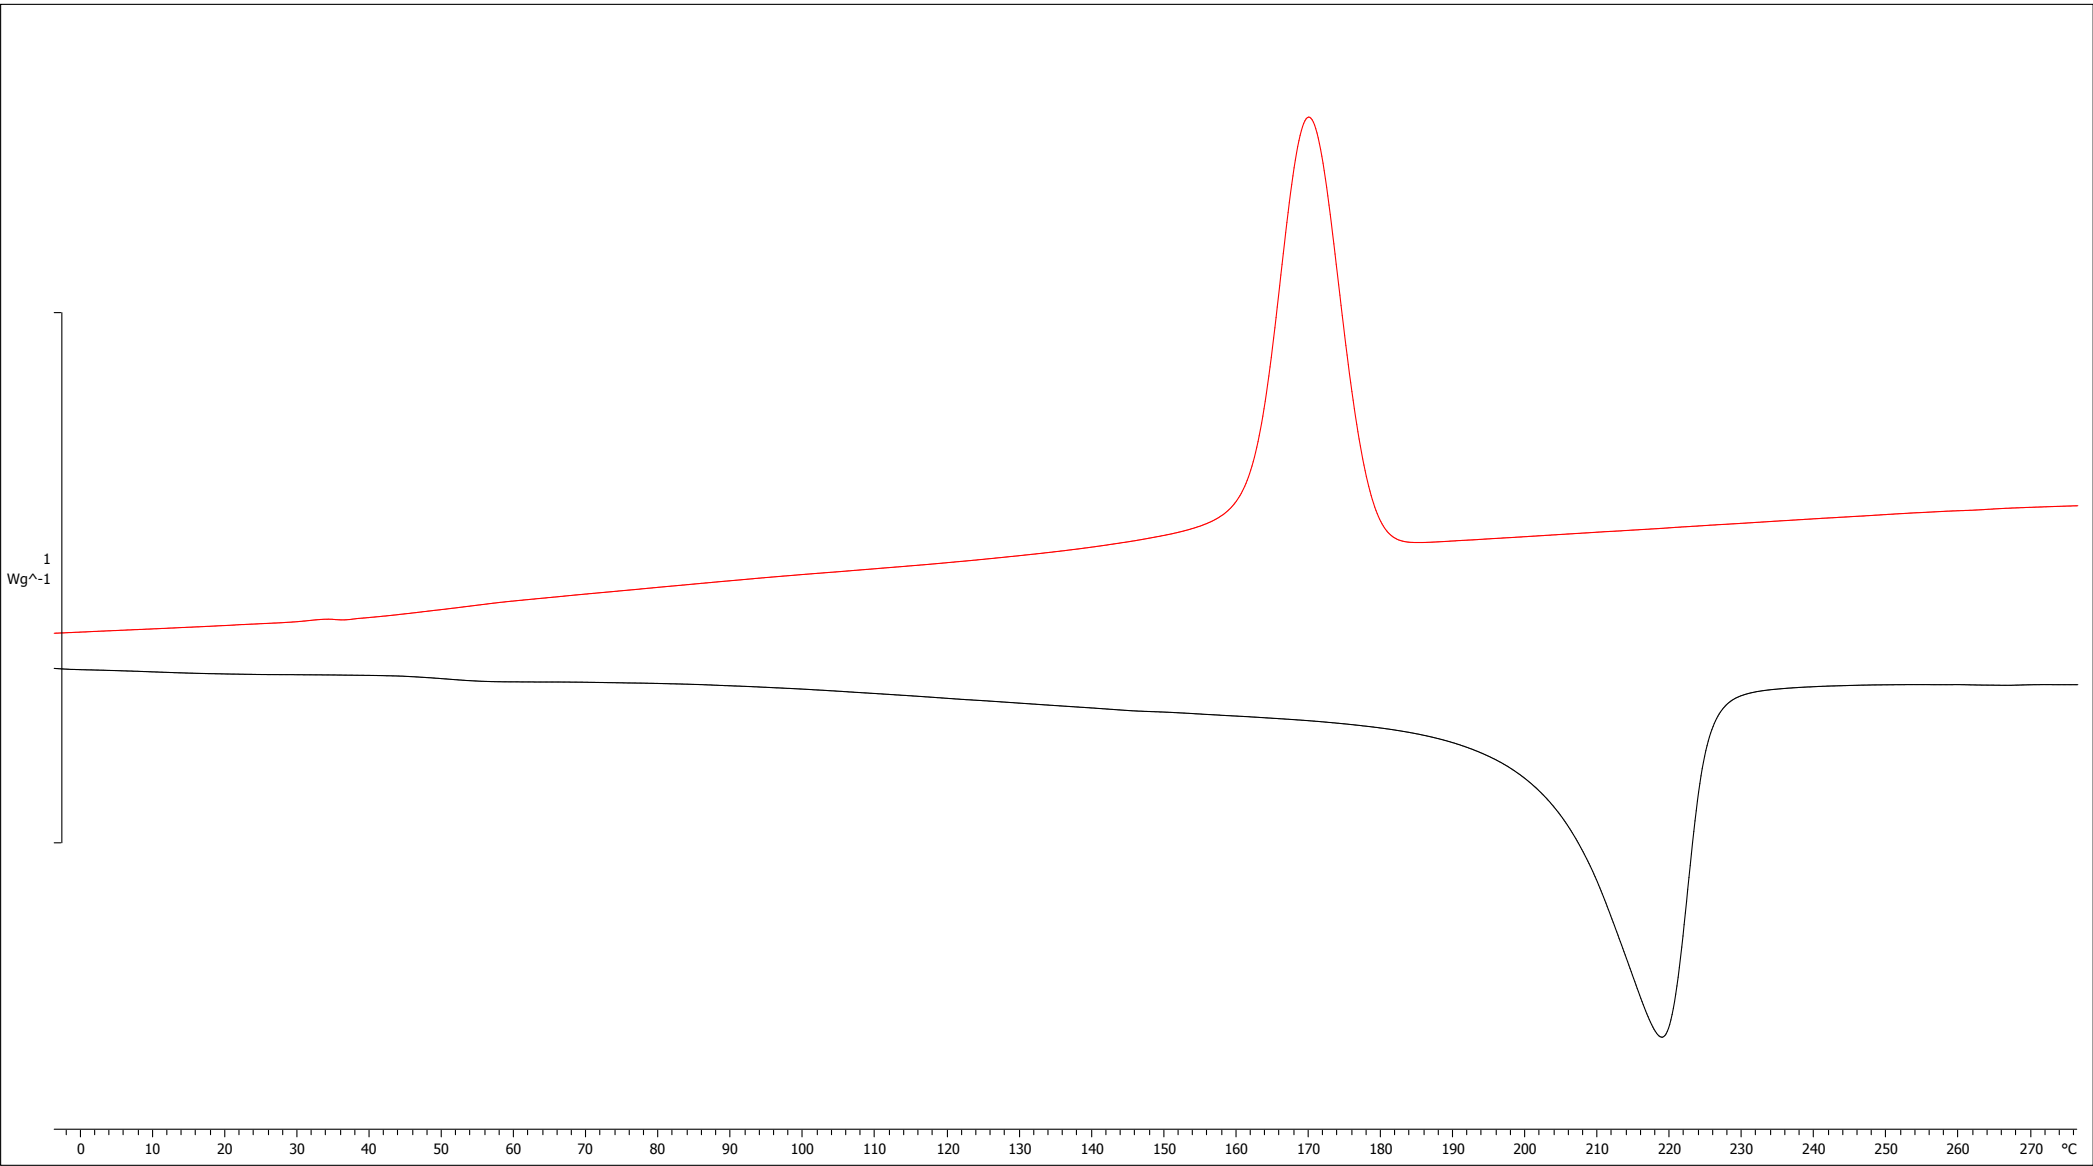

Supplement: s1 [file s1]

^exo

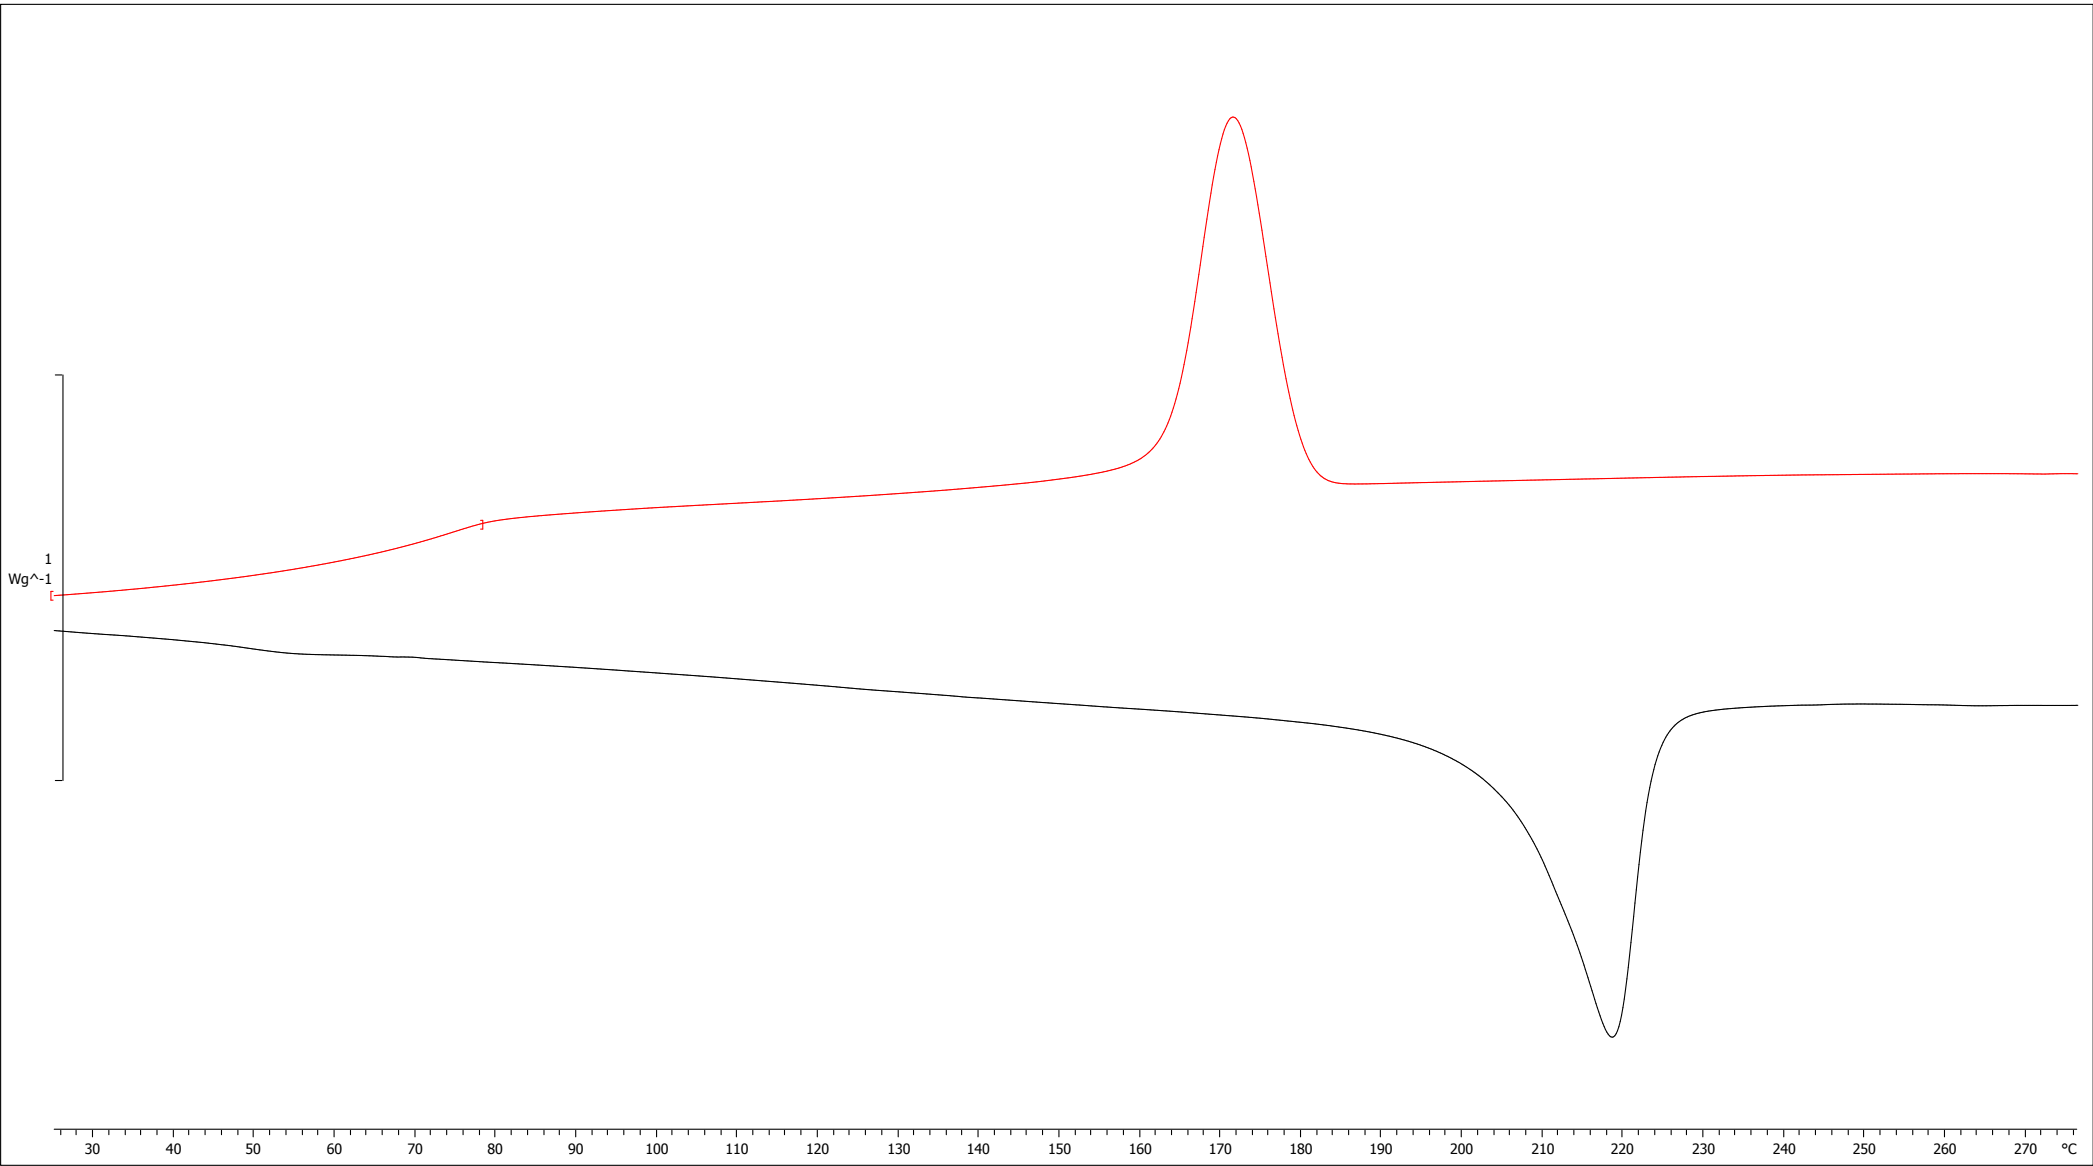

Supplement: s1 [file s1]

^exo

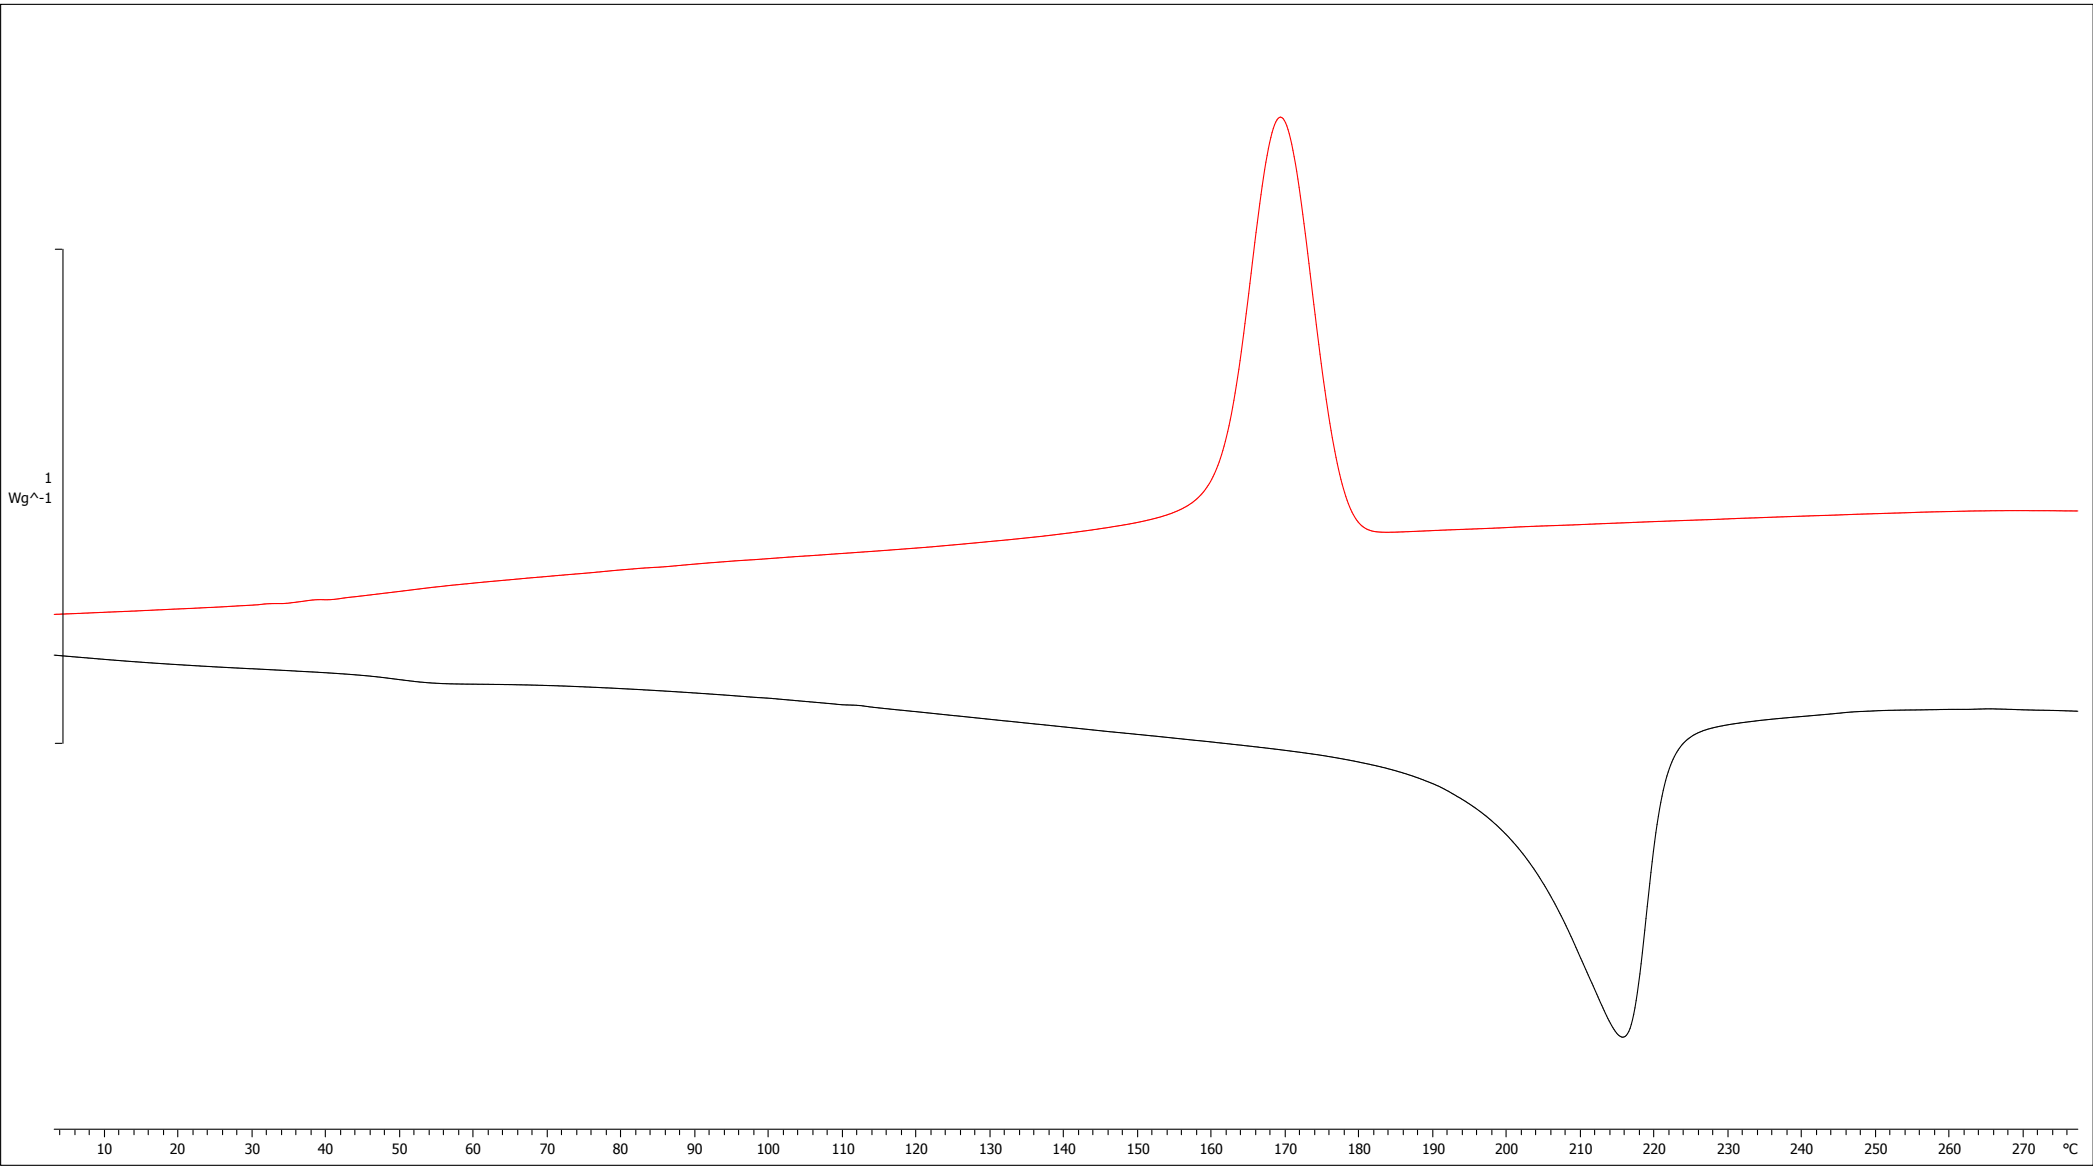

AE/ETC-Bp: DET2BP

STAR<sup>®</sup> SW 12.00

Supplement: s1 [file s1]

^exo

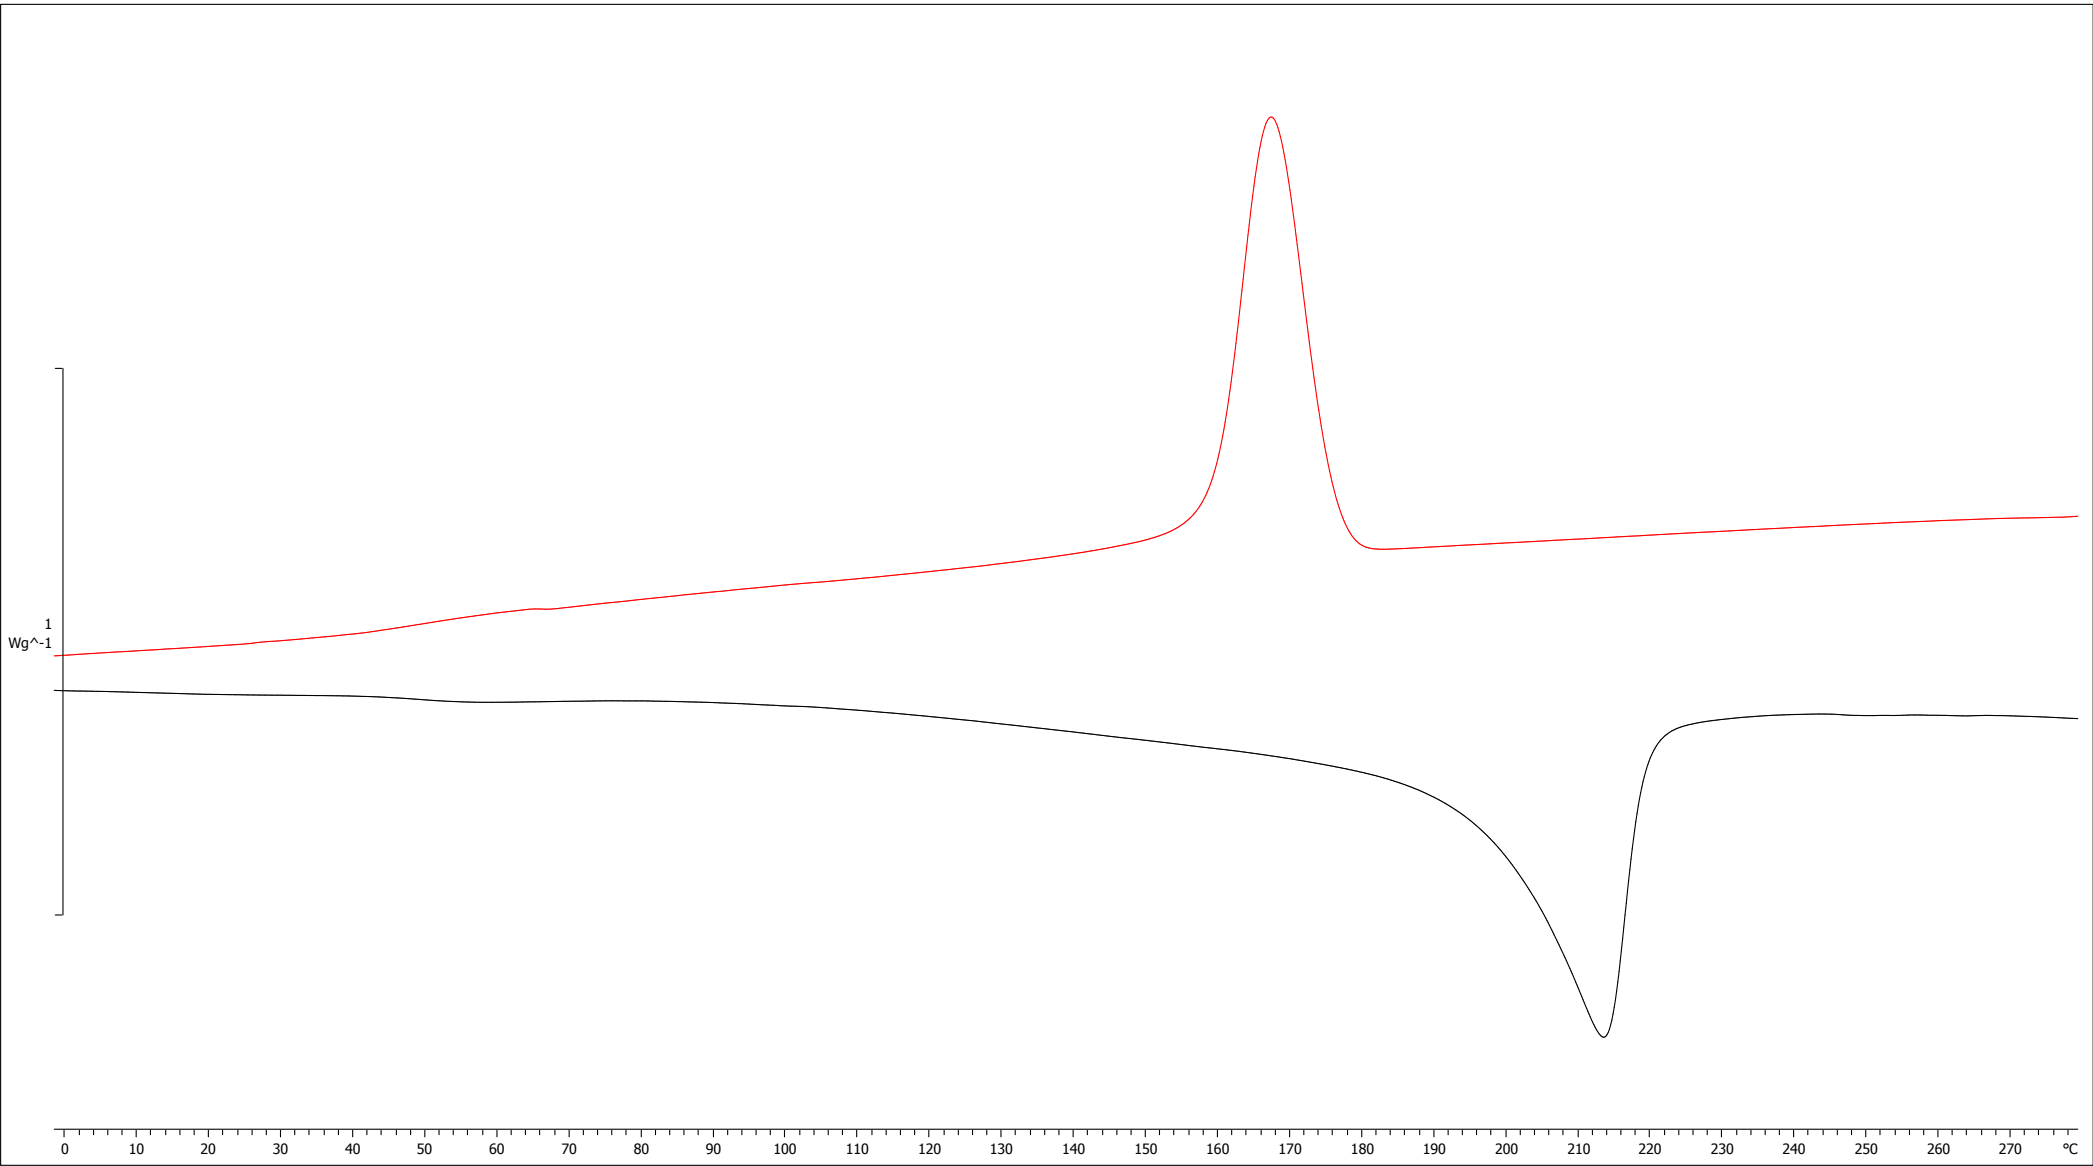

Supplement: s1 [file s1]

^exo

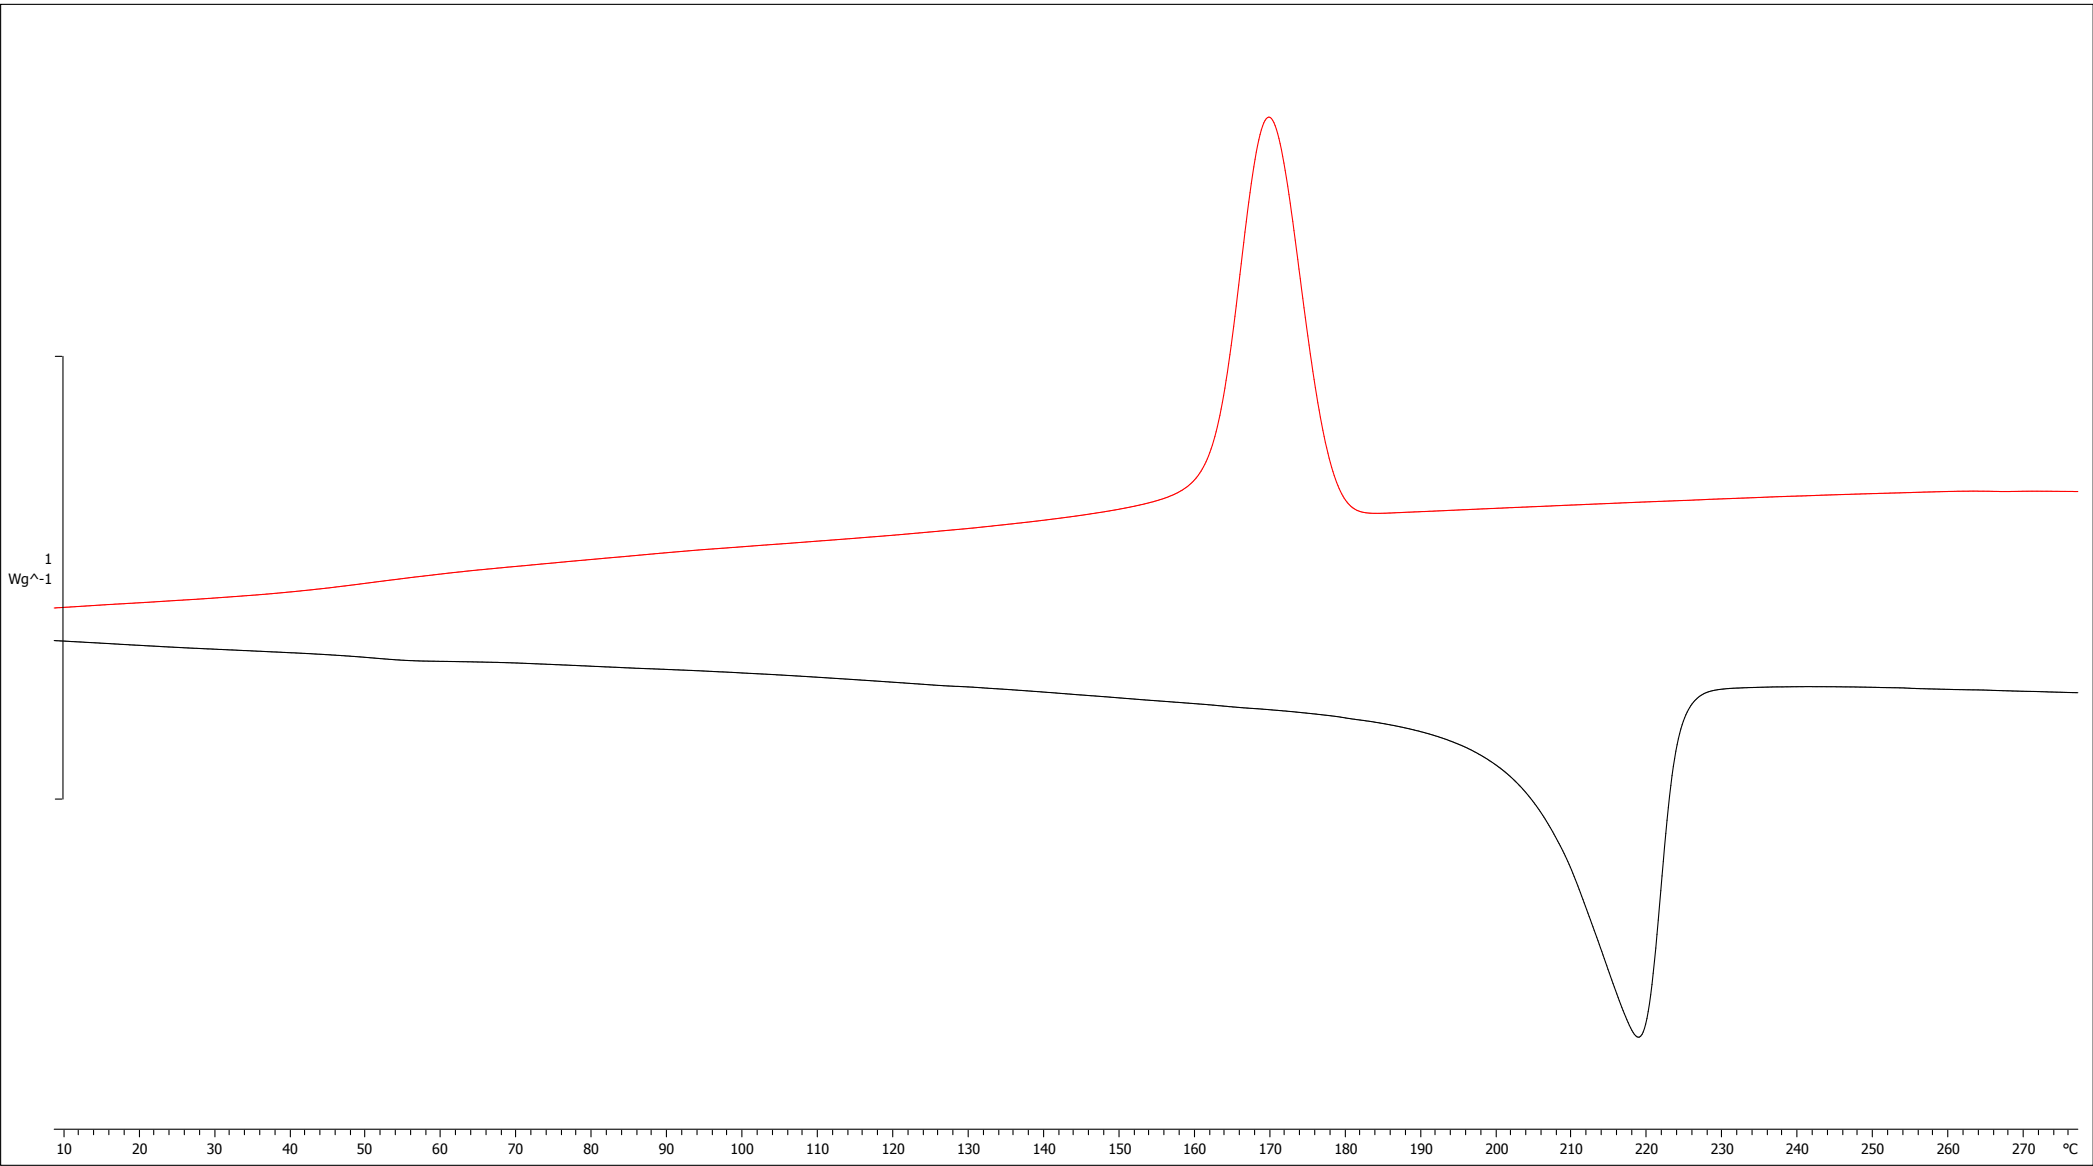

AE/ETC-Bp: DET2BP

STAR<sup>®</sup> SW 12.00

Supplement: s1 [file s1]

^exo

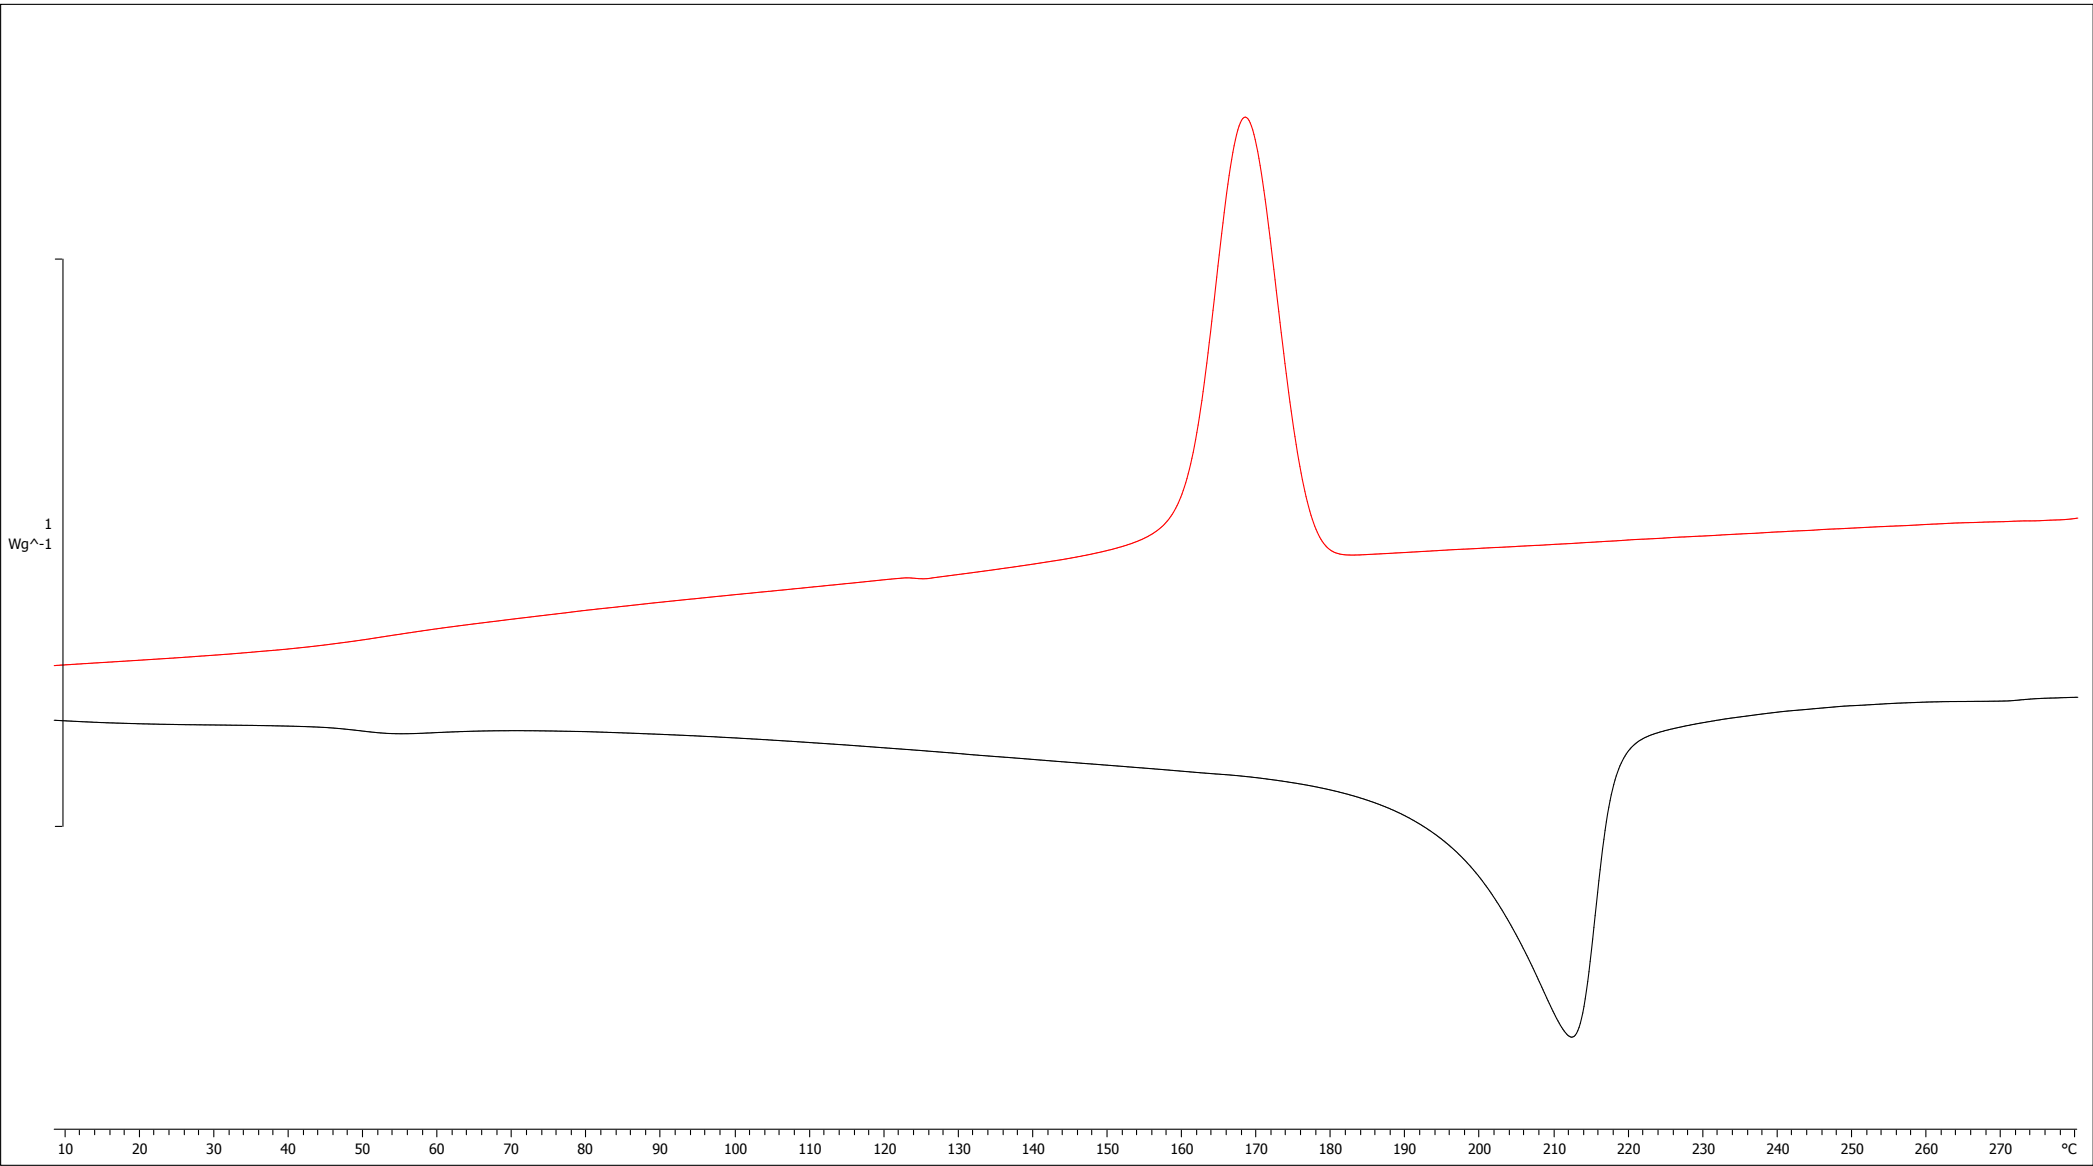

Supplement: s1 [file s1]

^exo

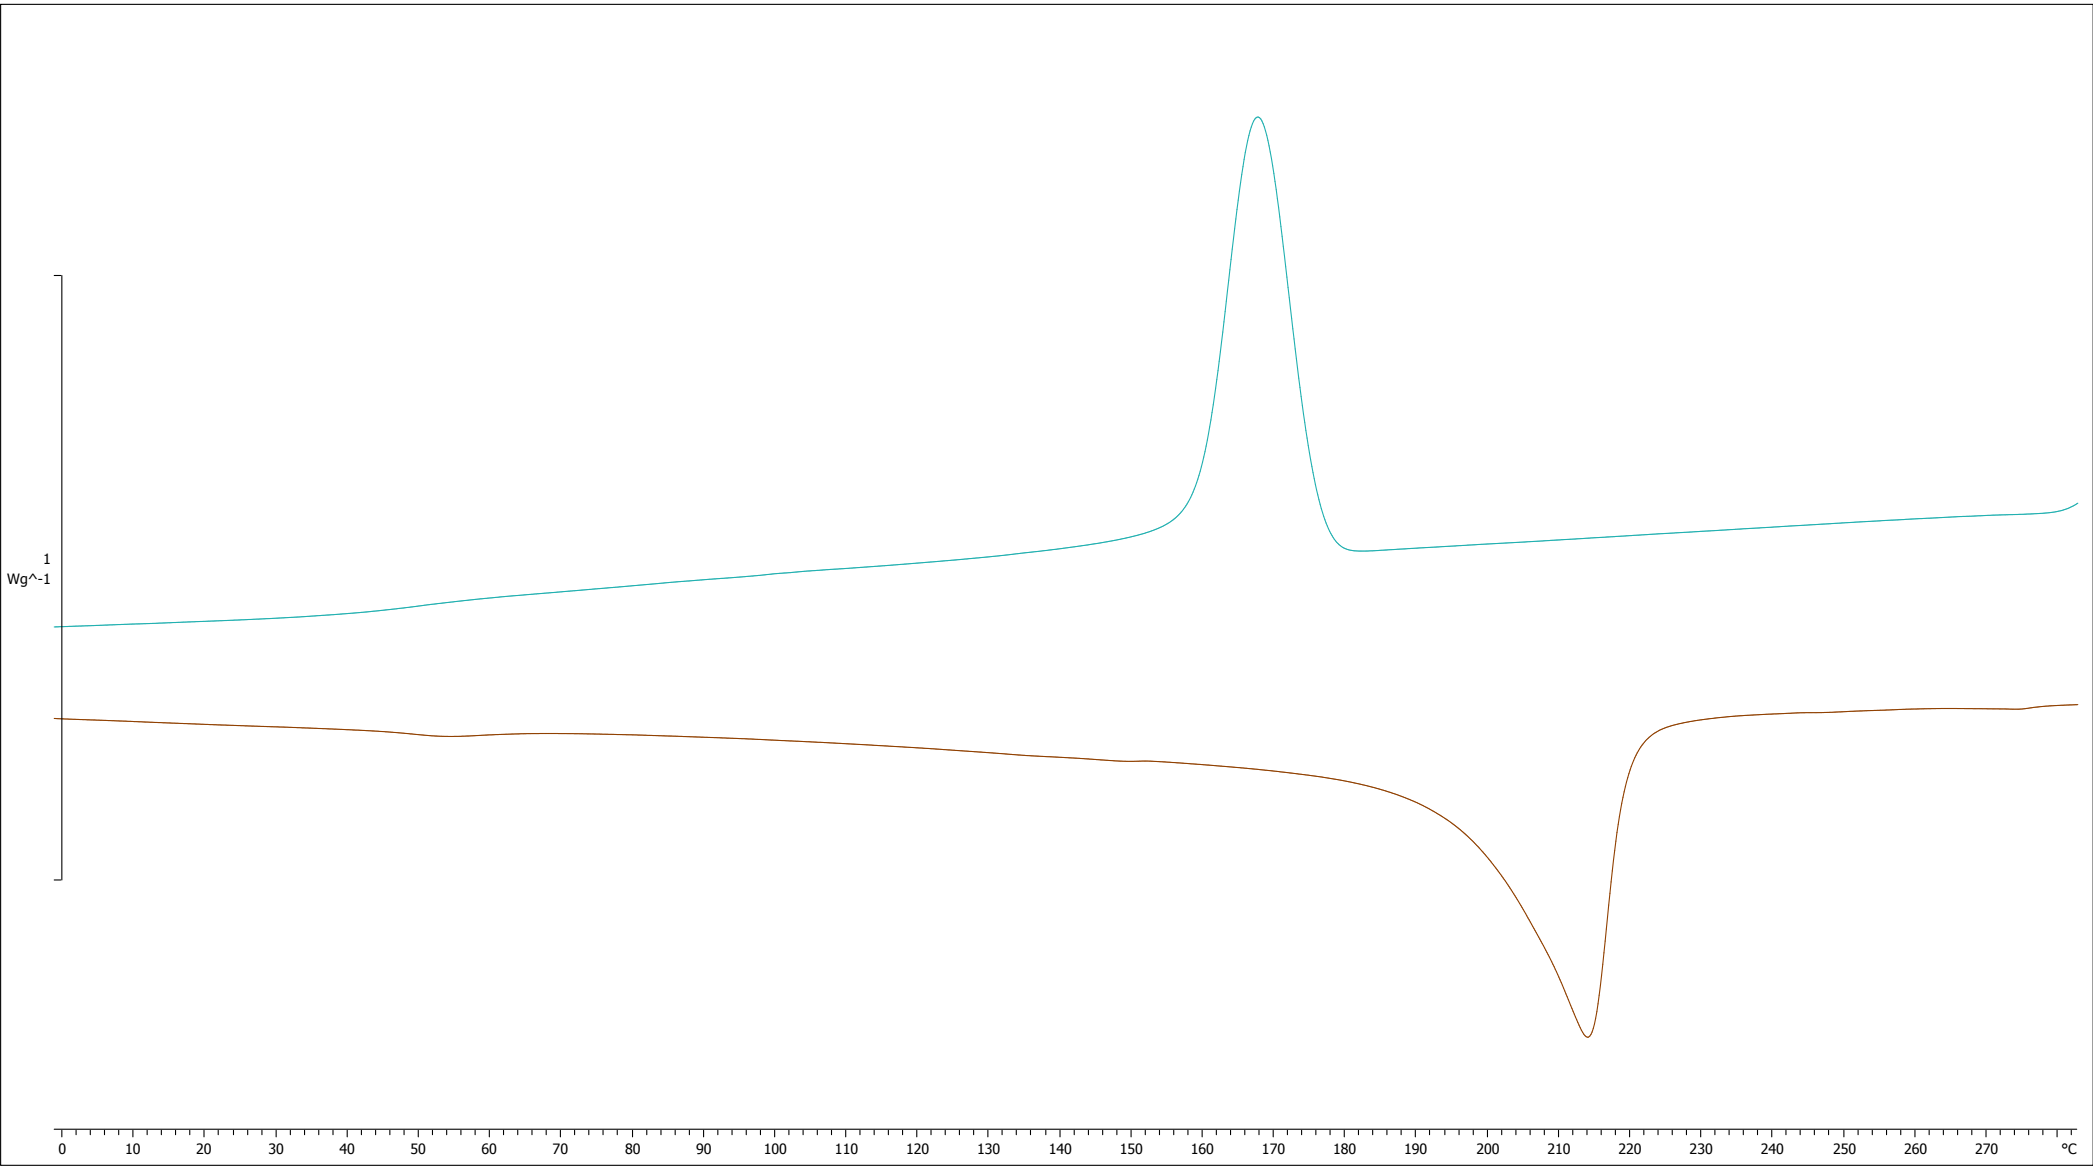

Supplement: s1 [file s1]

^exo

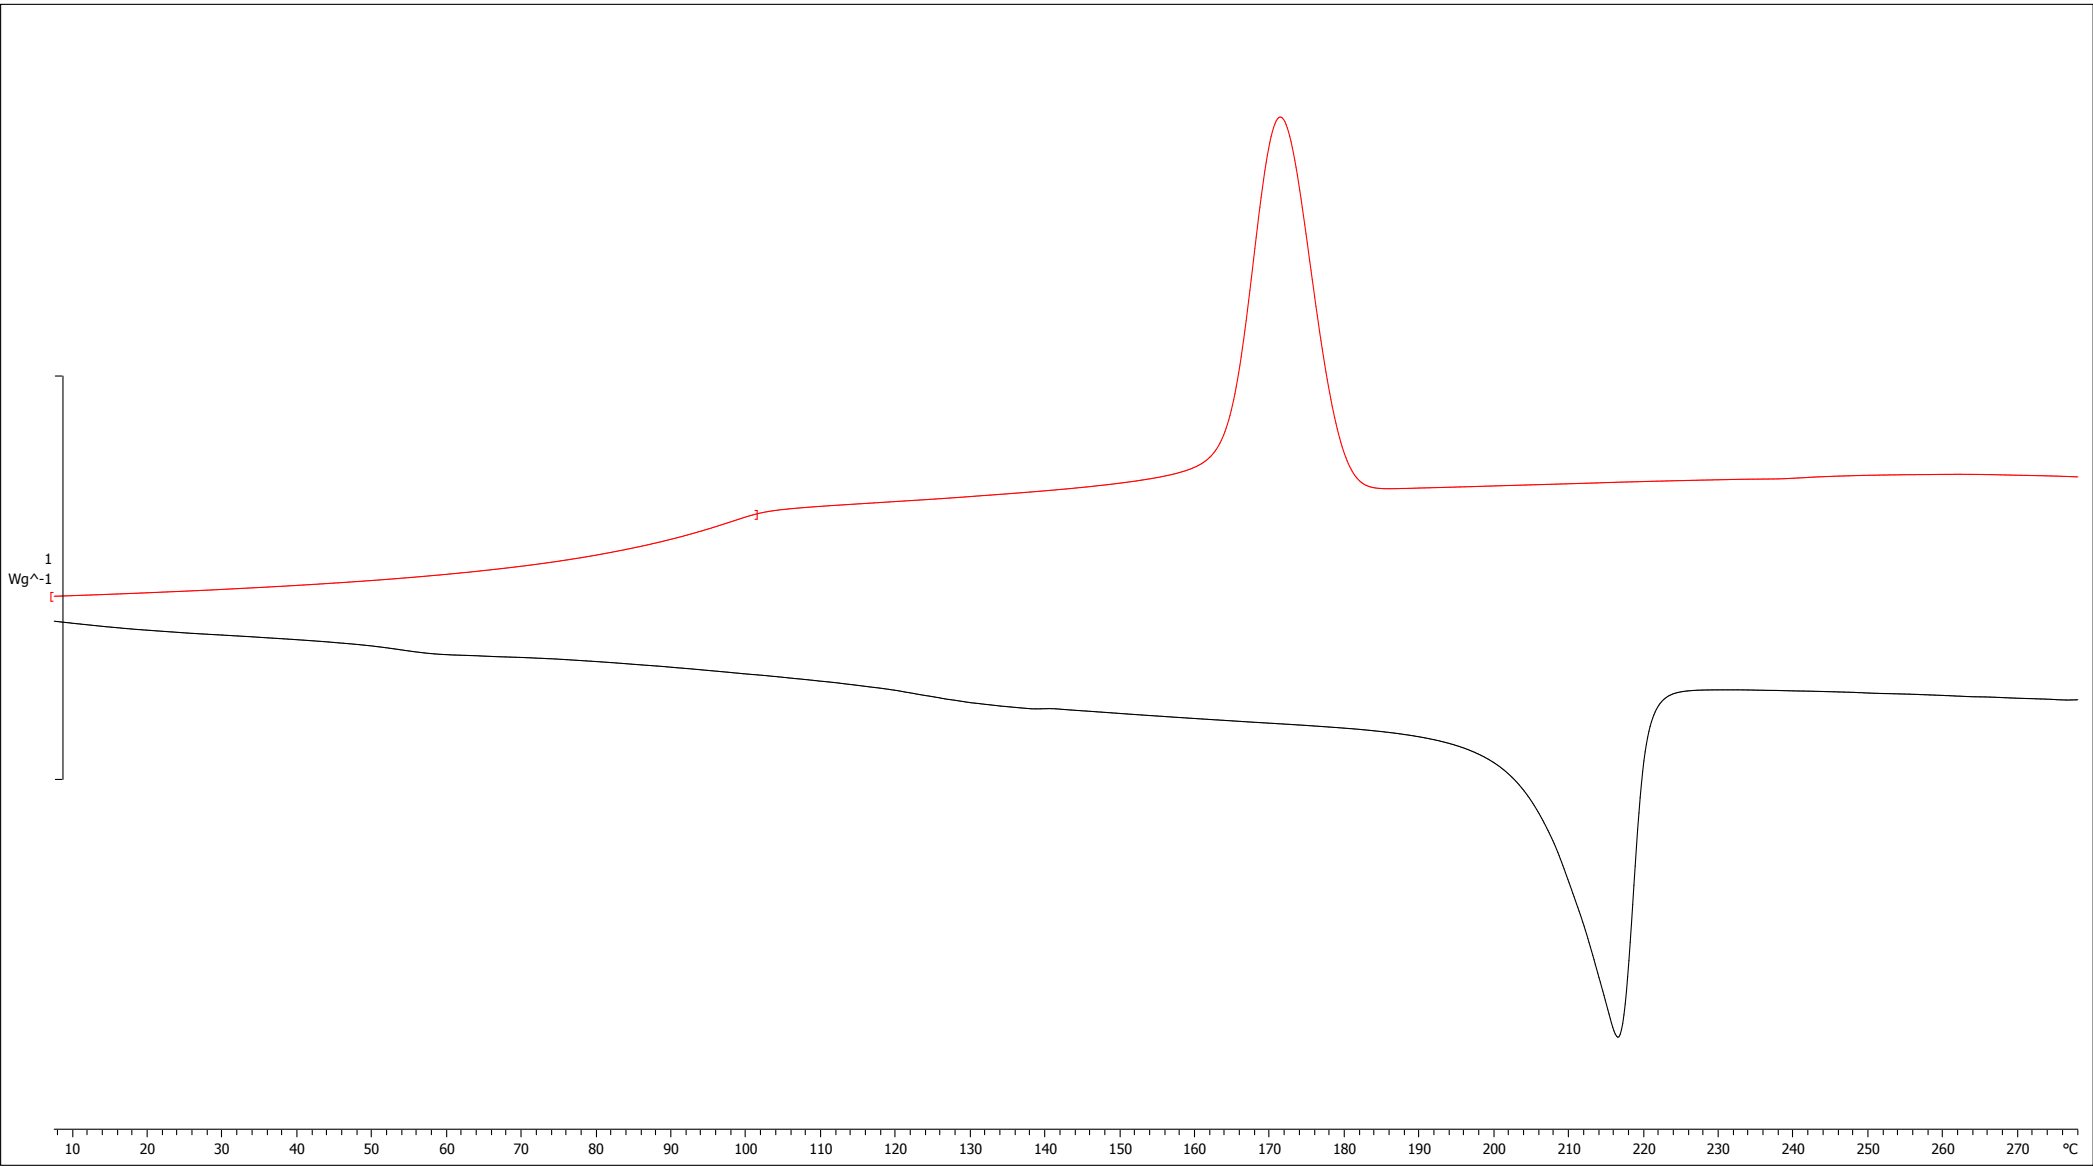

Supplement: s1 [file s1]

^exo

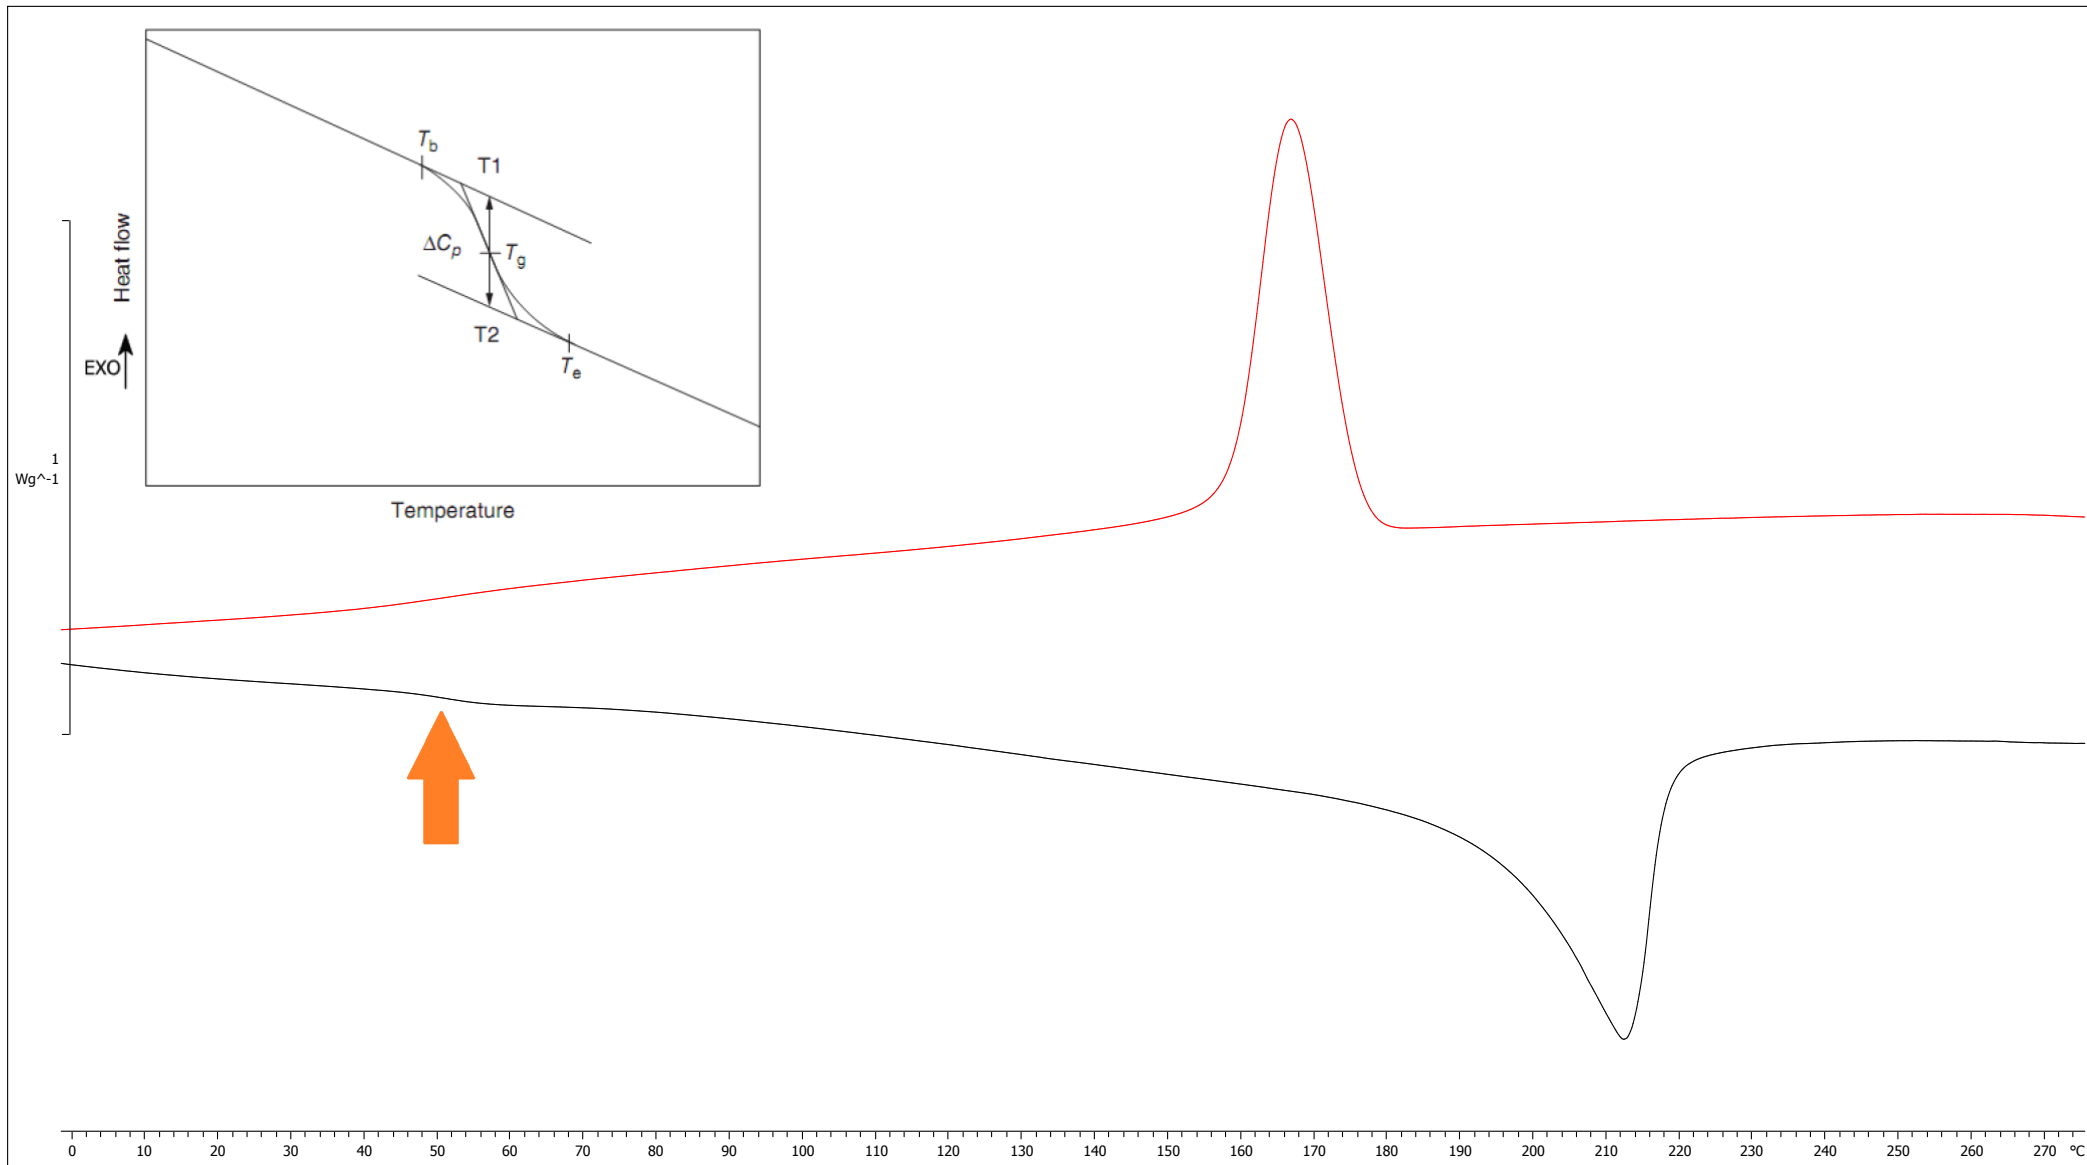

Supplement: s1 [file s1]

^exo

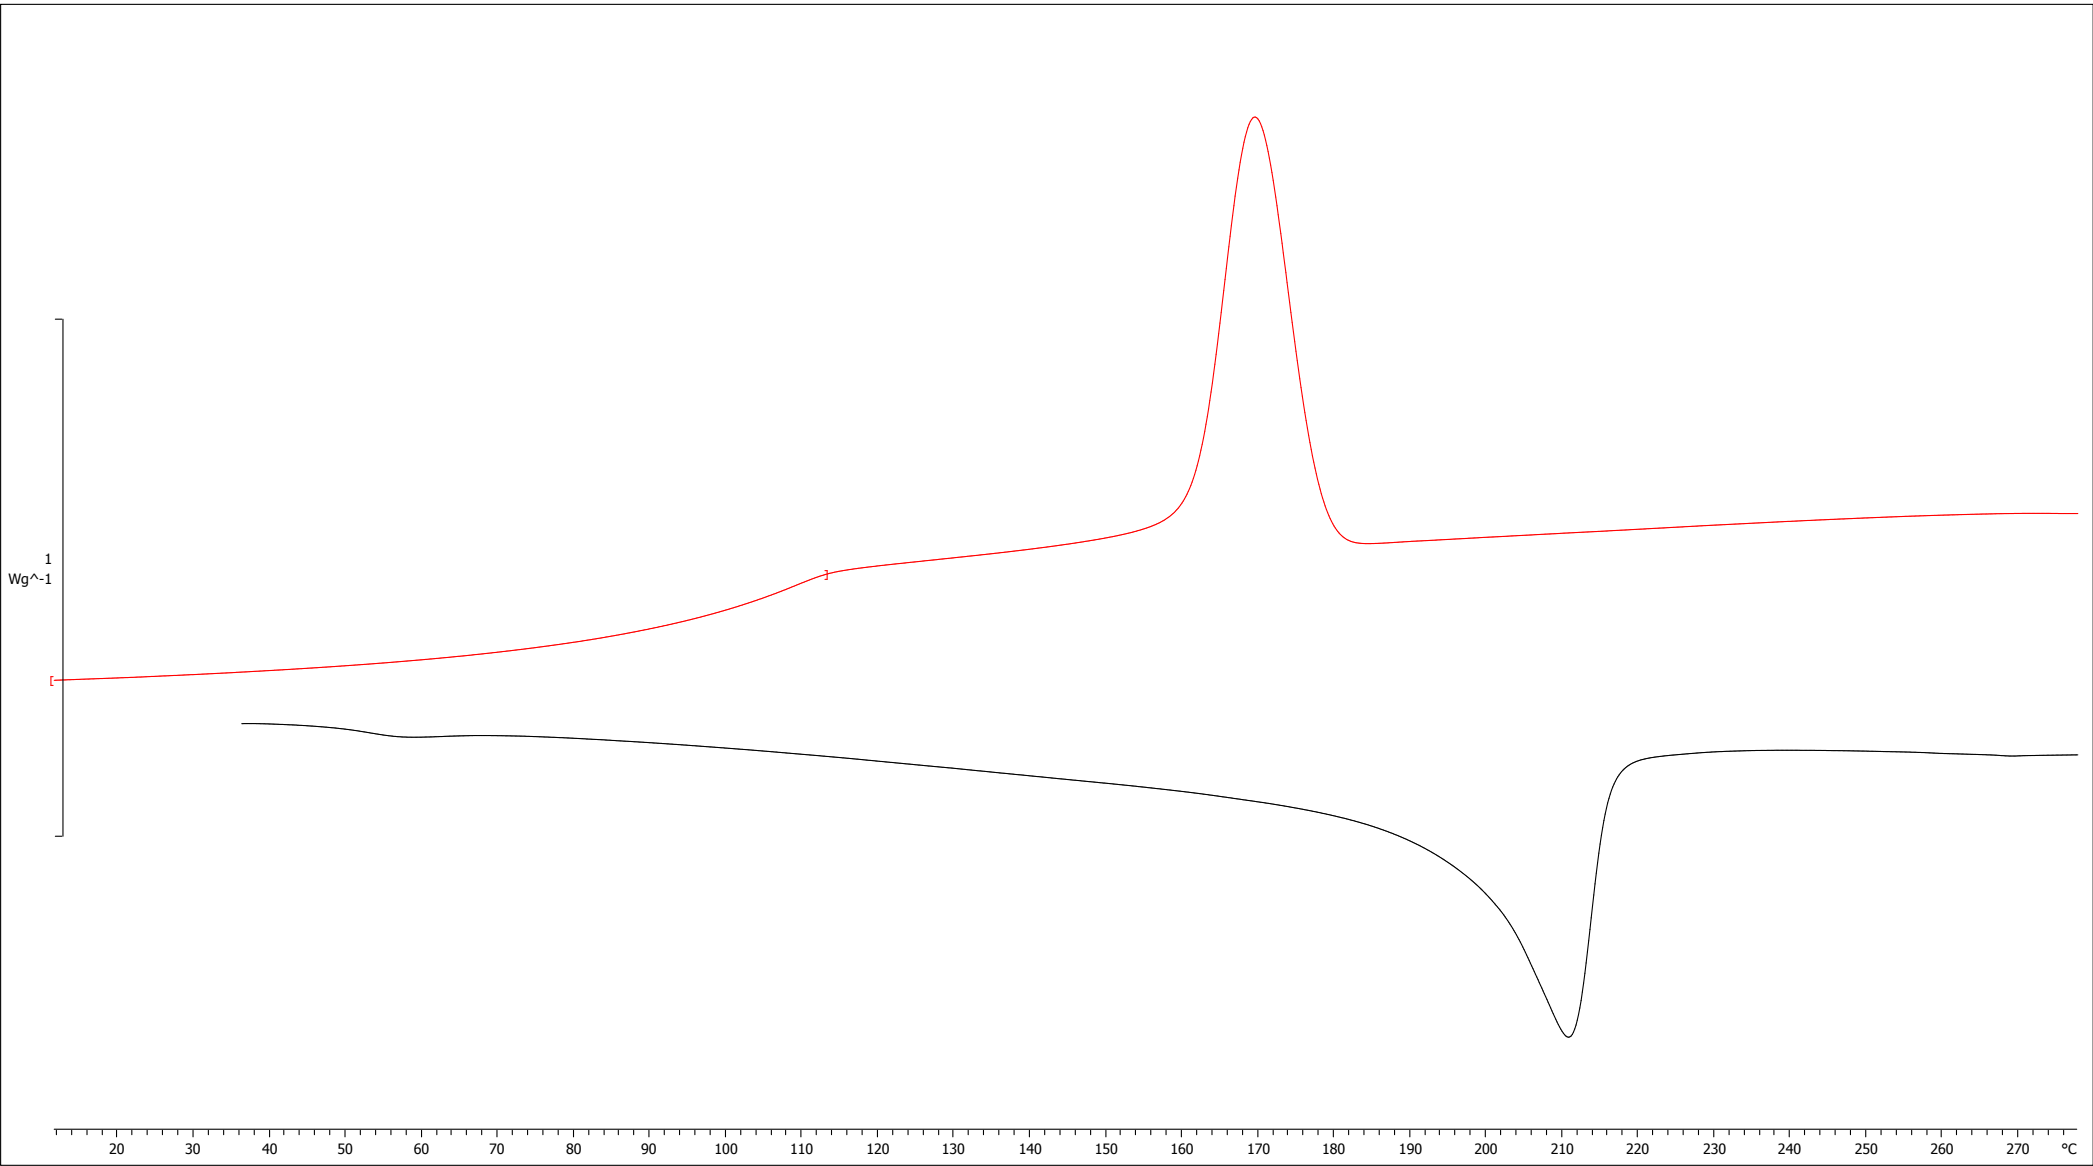

AE/ETC-Bp: DET2BP

STAR<sup>®</sup> SW 12.00

Supplement: s1 [file s1]

^exo

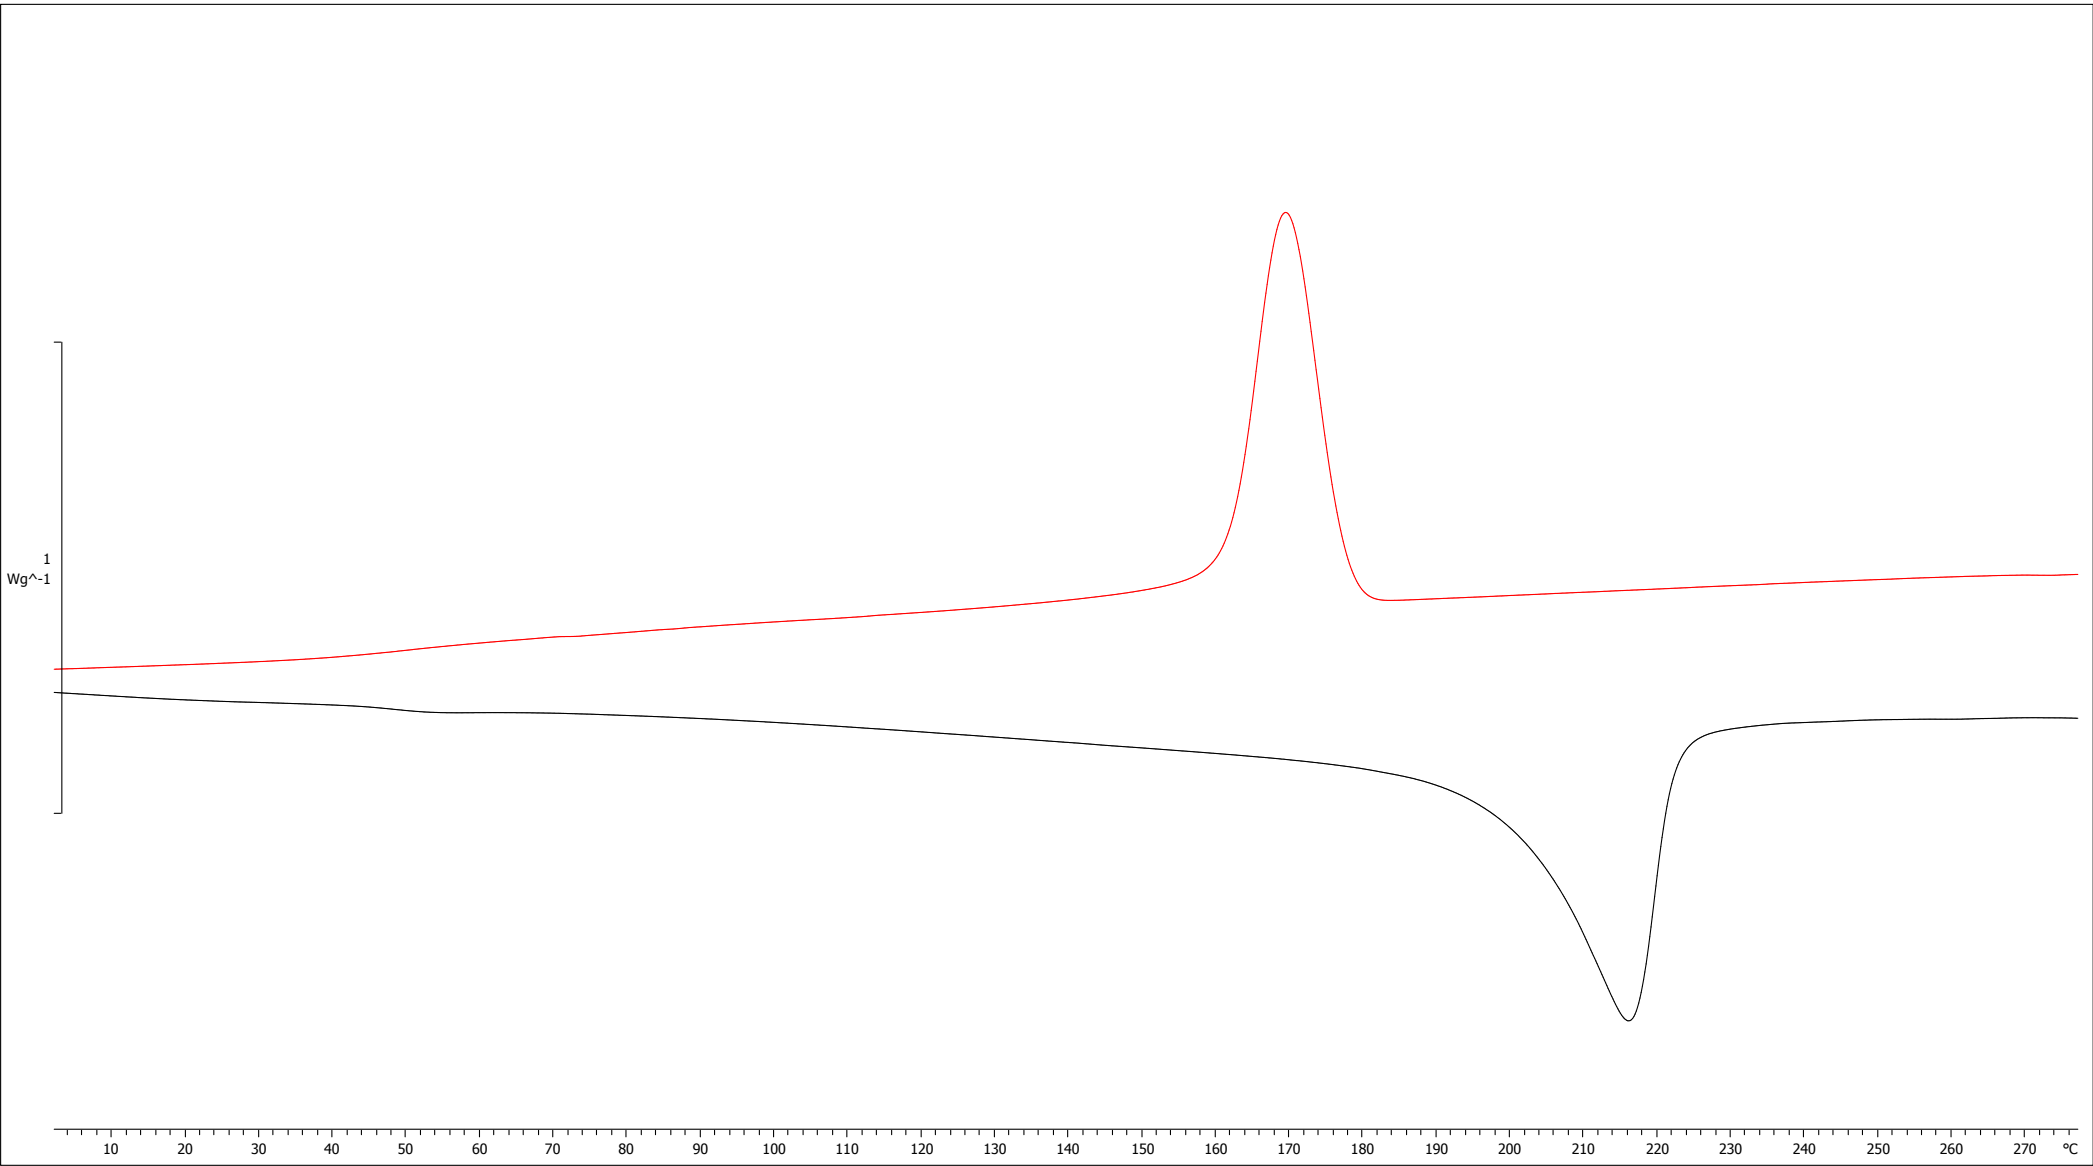

AE/ETC-Bp: DET2BP

STAR<sup>®</sup> SW 12.00

Supplement: s1 [file s1]

^exo

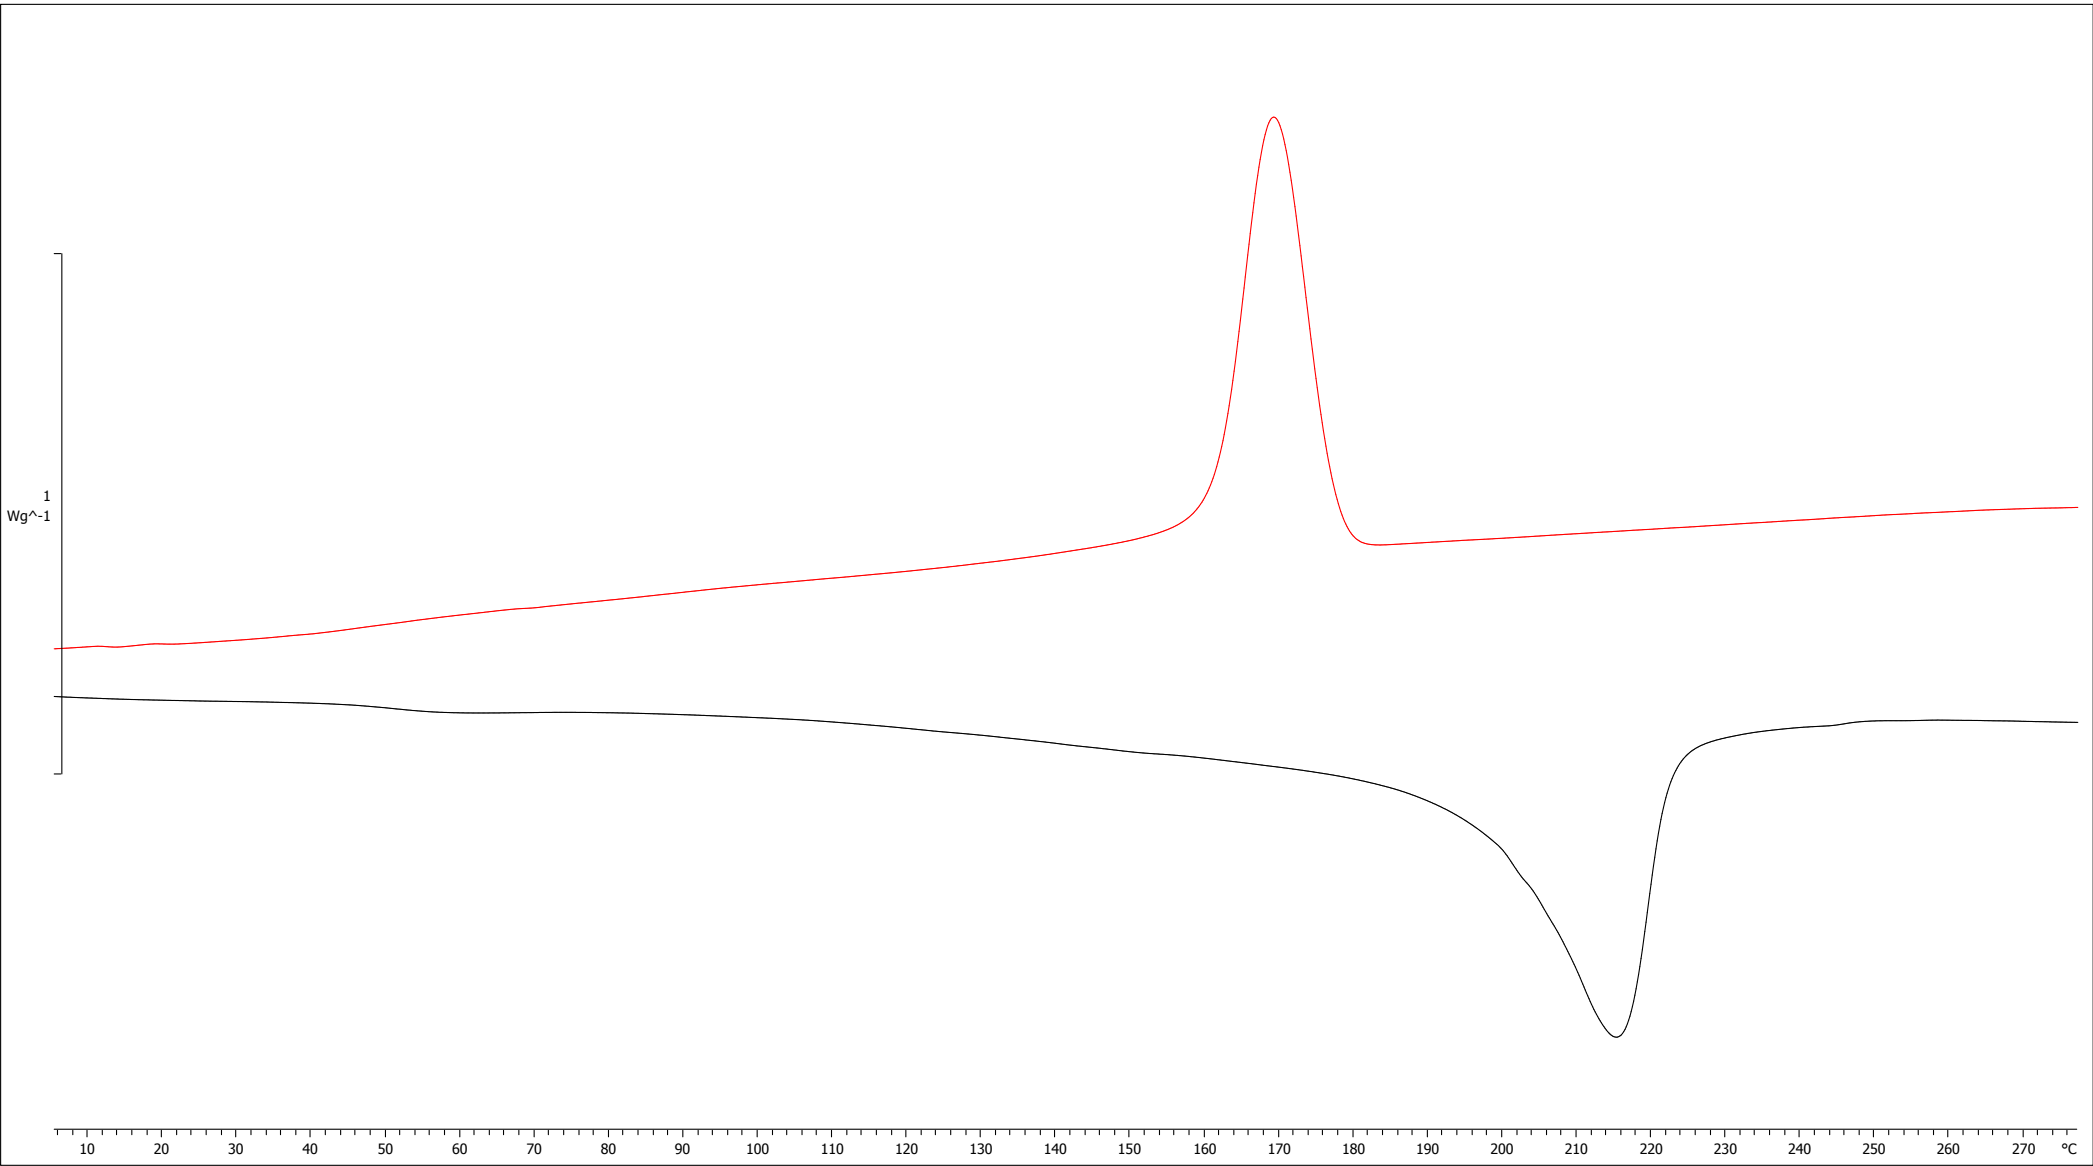

AE/ETC-Bp: DET2BP

STAR<sup>®</sup> SW 12.00

Supplement: s1 [file s1]

^exo

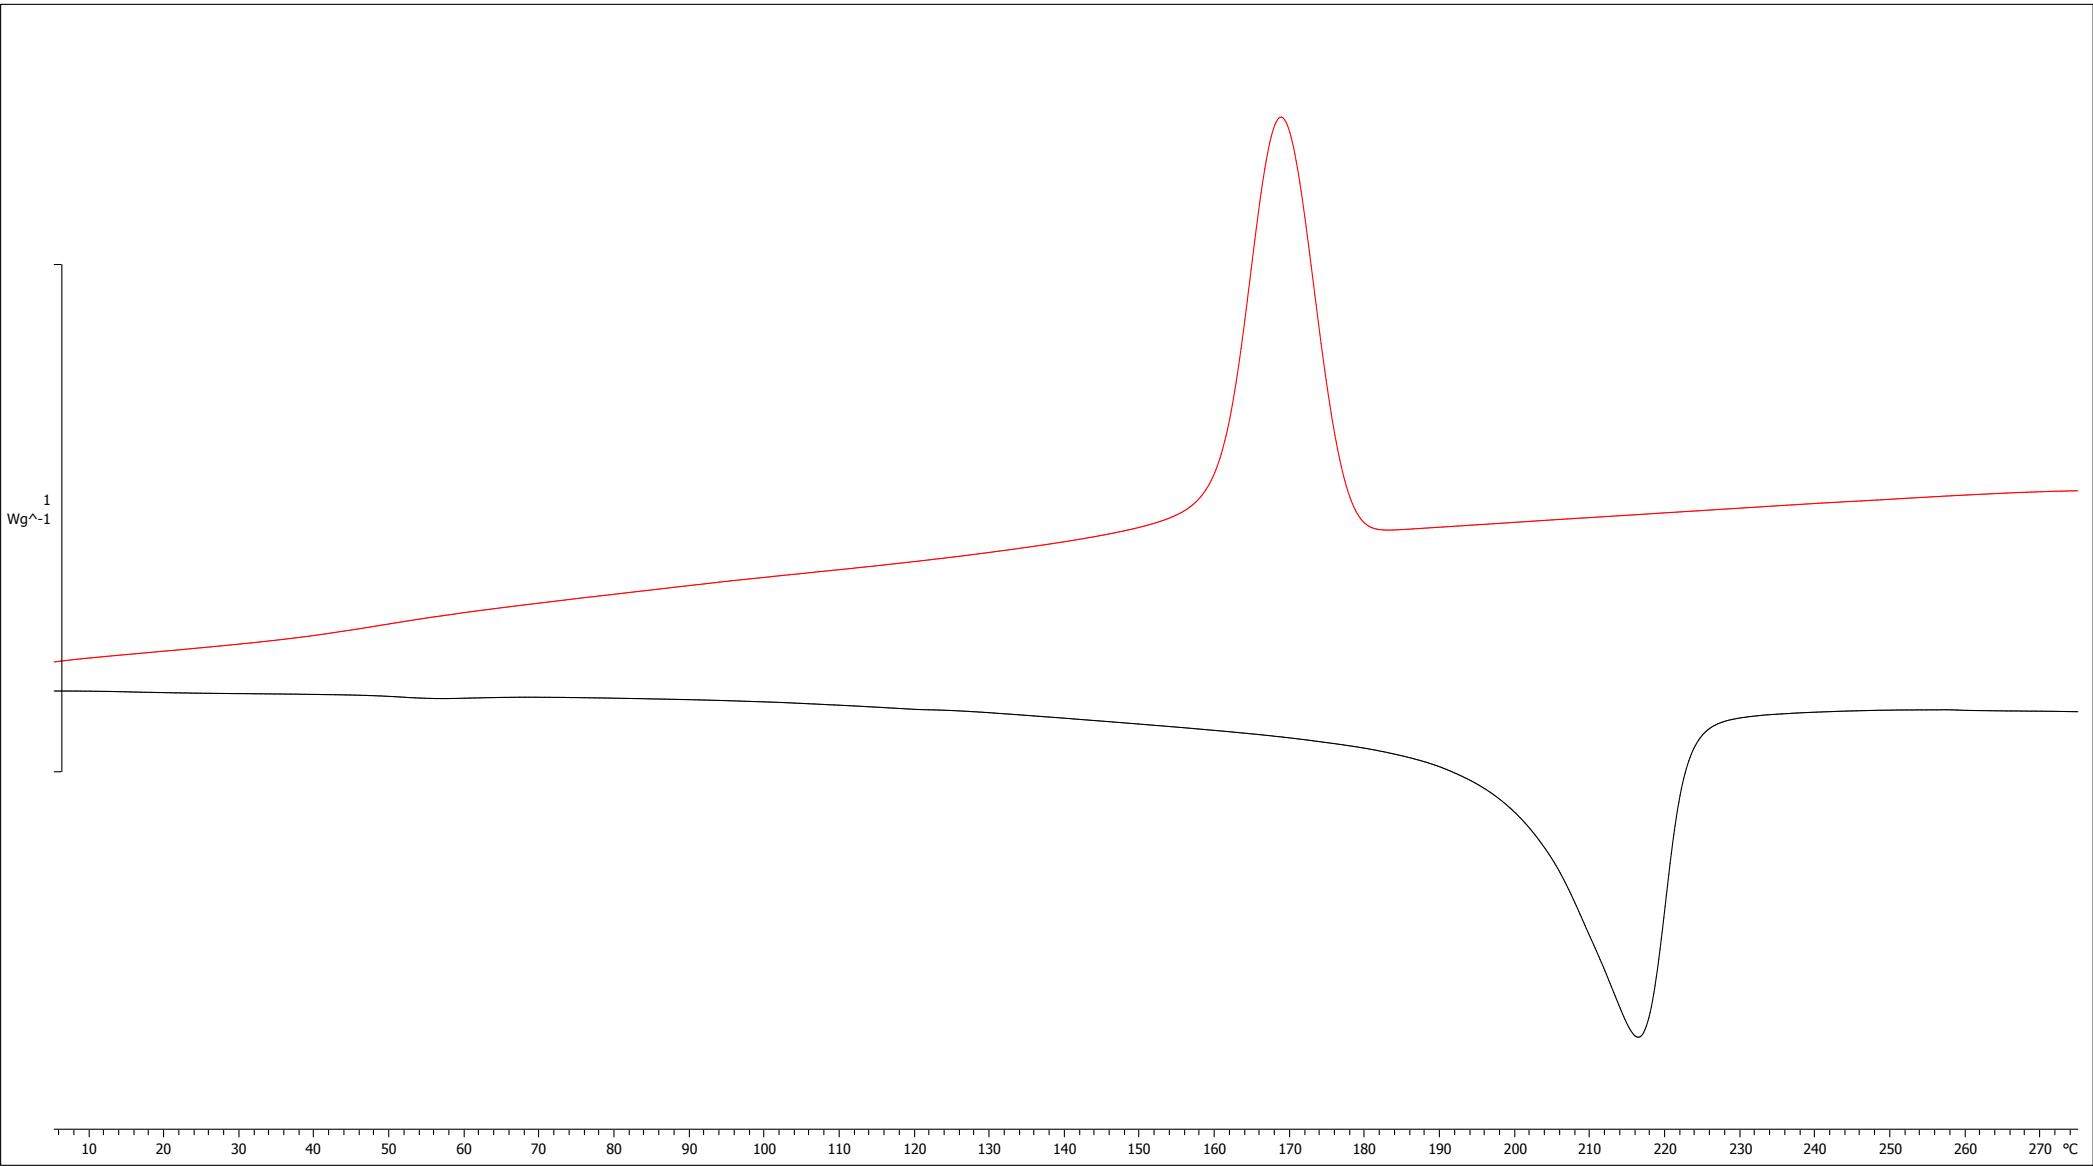

Supplement: s1 [file s1]

^exo

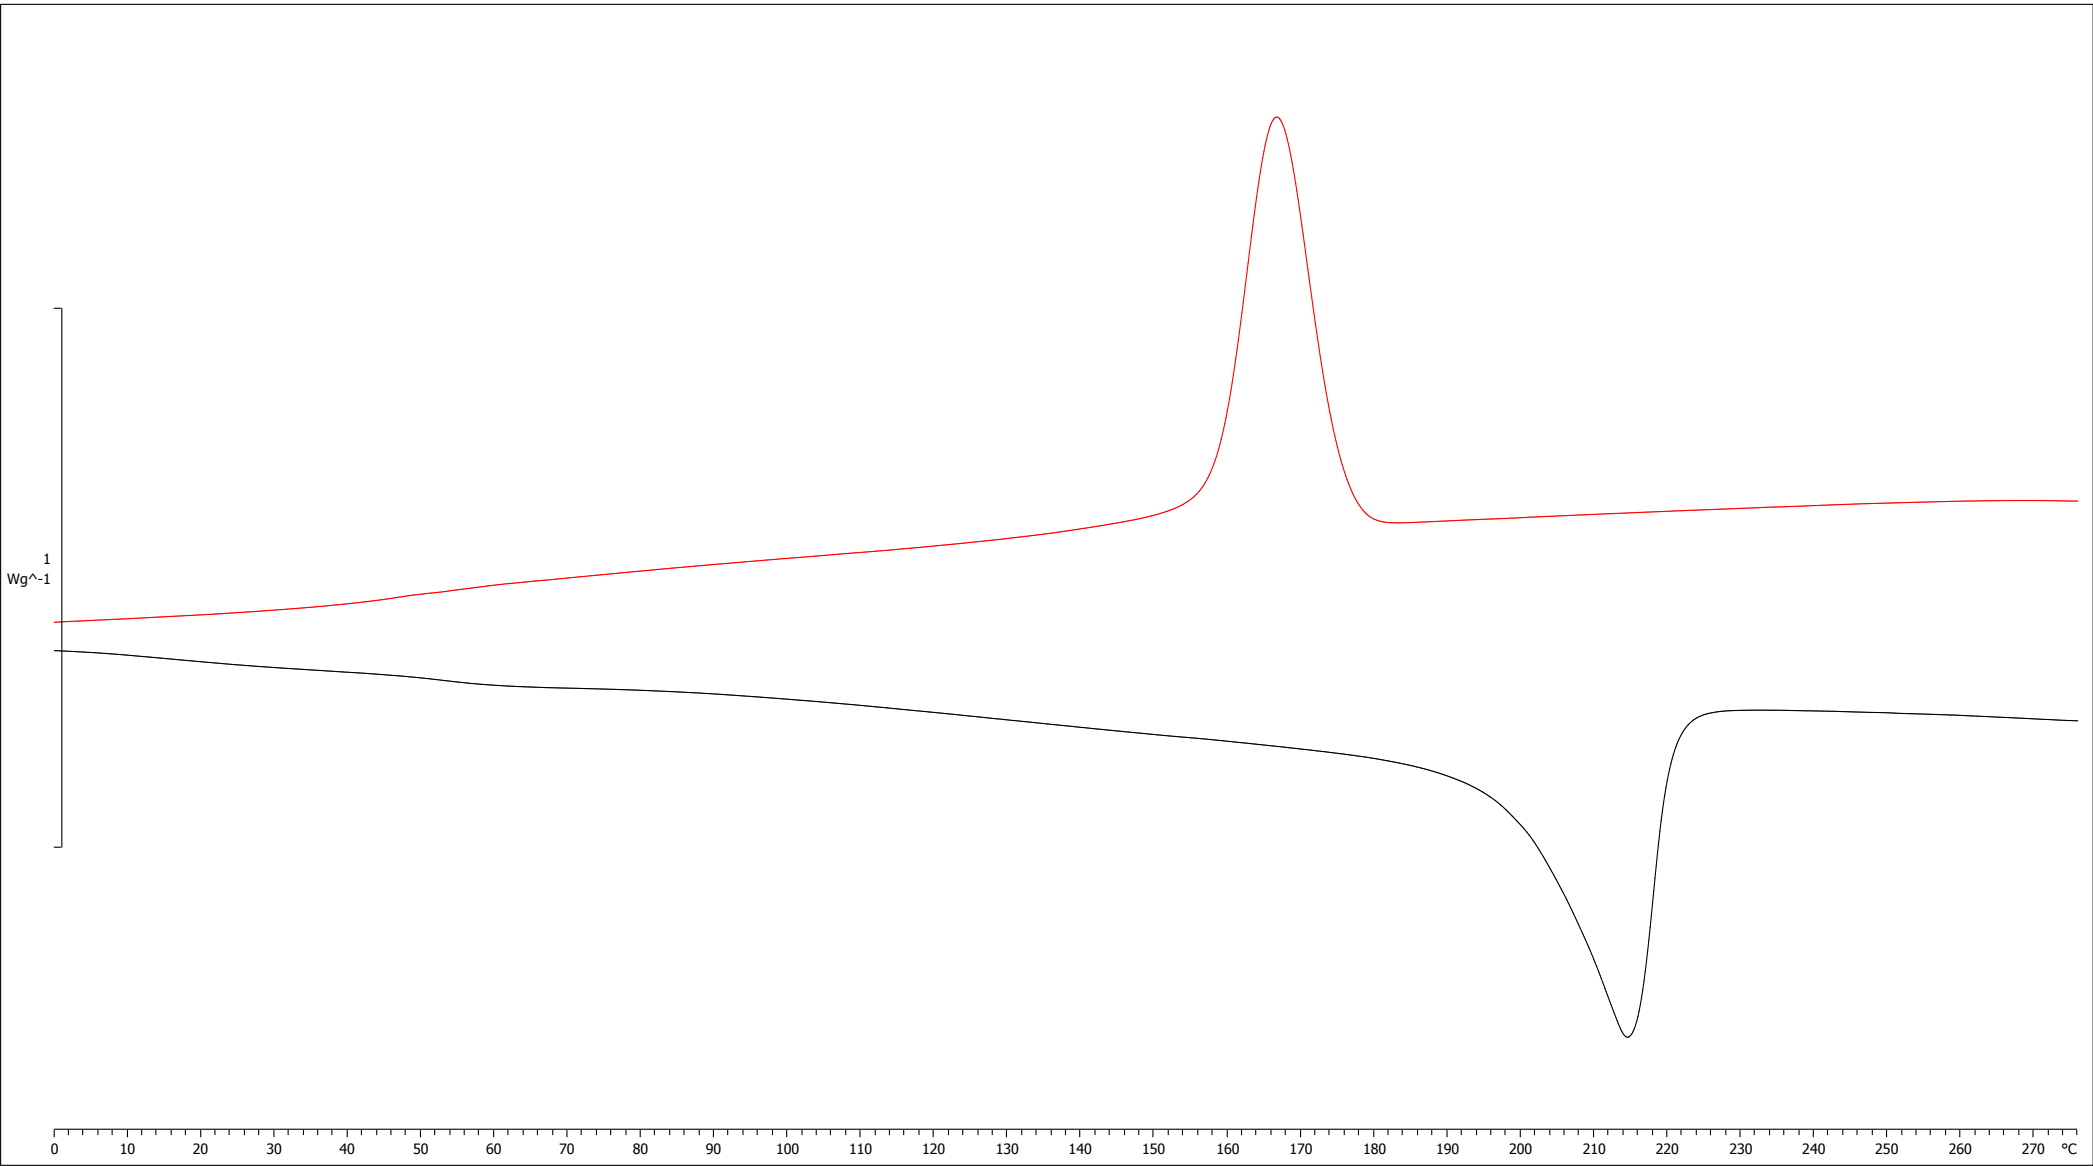

AE/ETC-Bp: DET2BP

STAR<sup>®</sup> SW 12.00

Supplement: s1 [file s1]

^exo

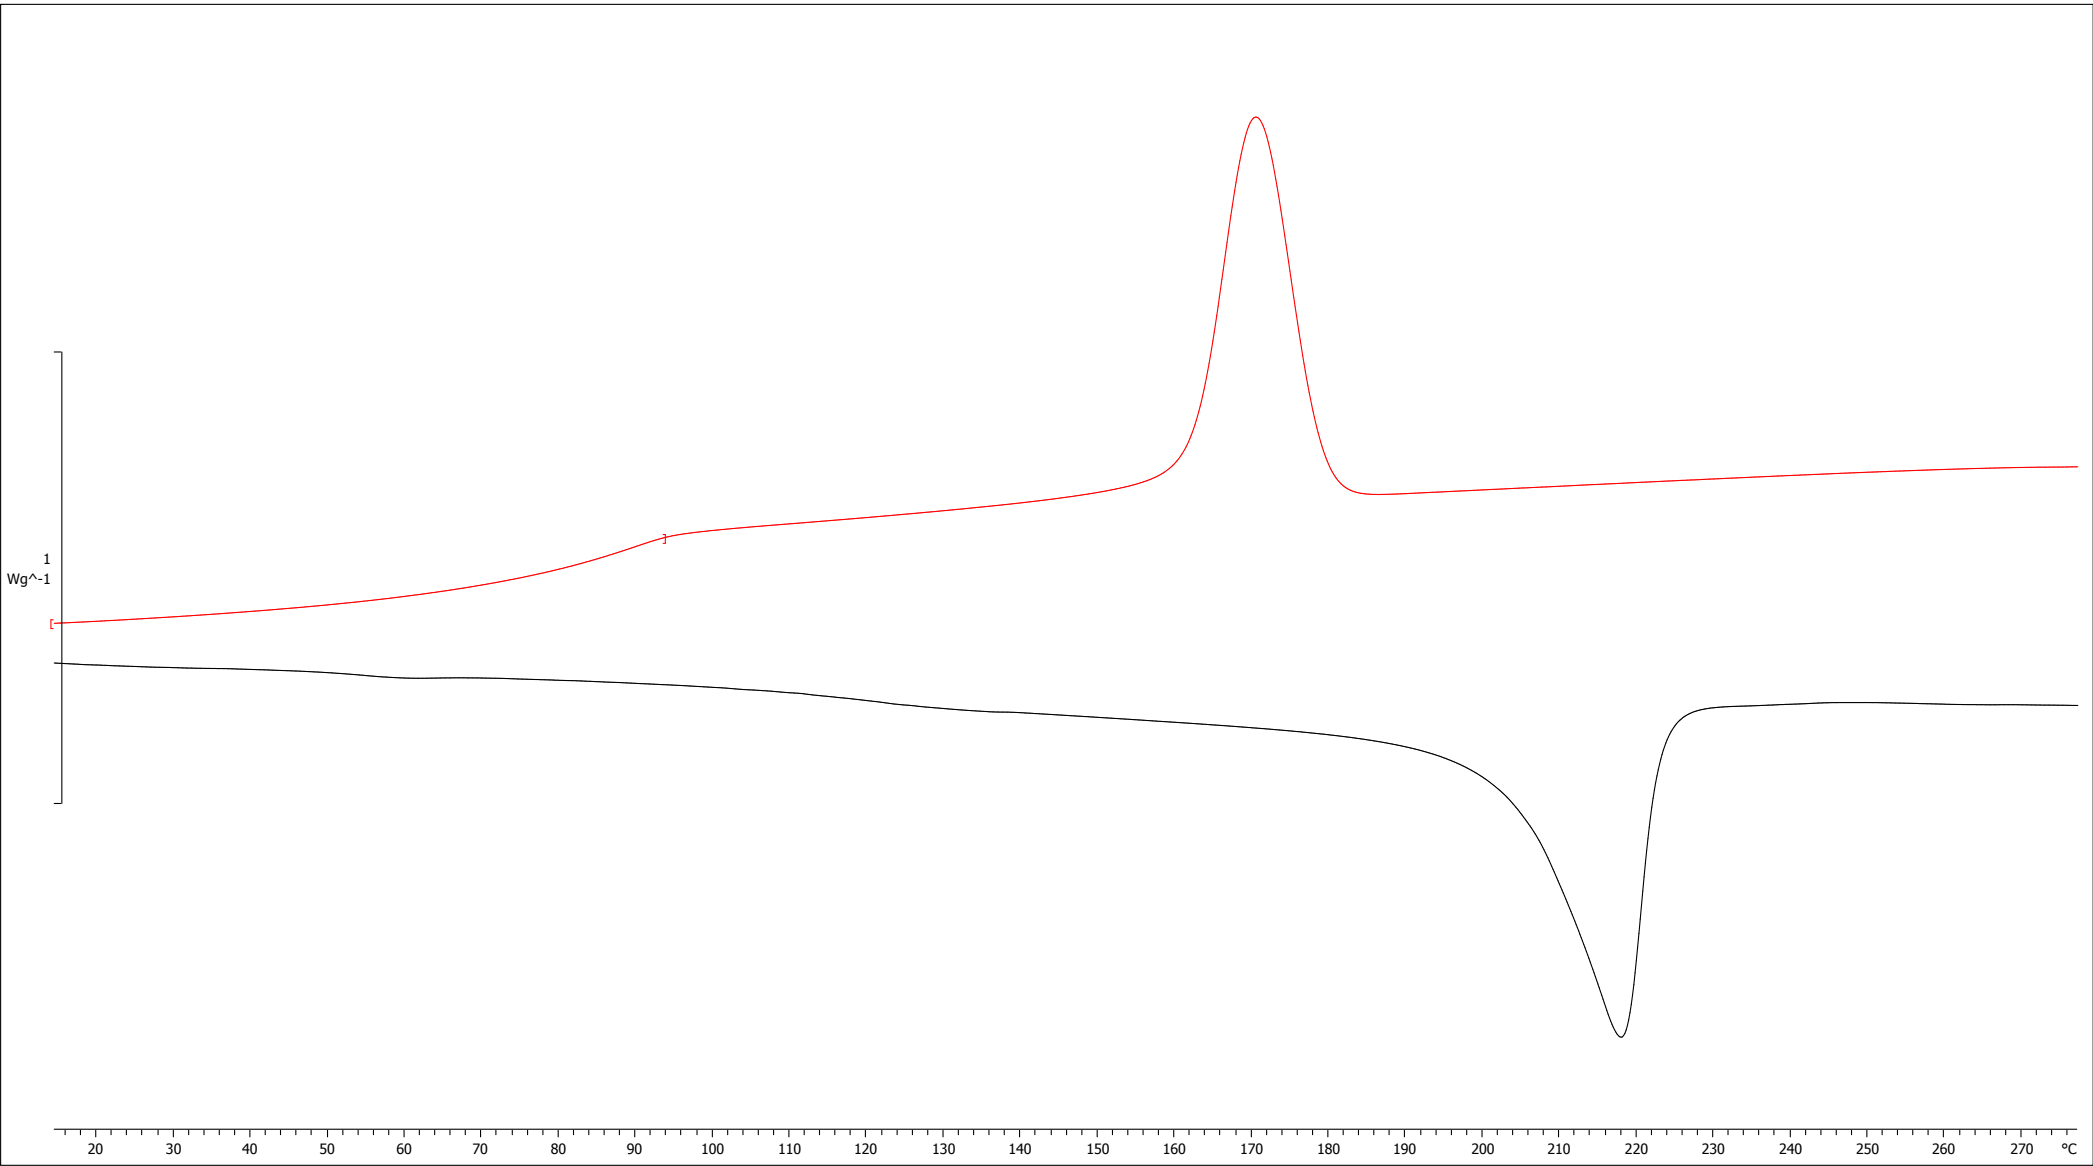

Supplement: s1 [file s1]

^exo

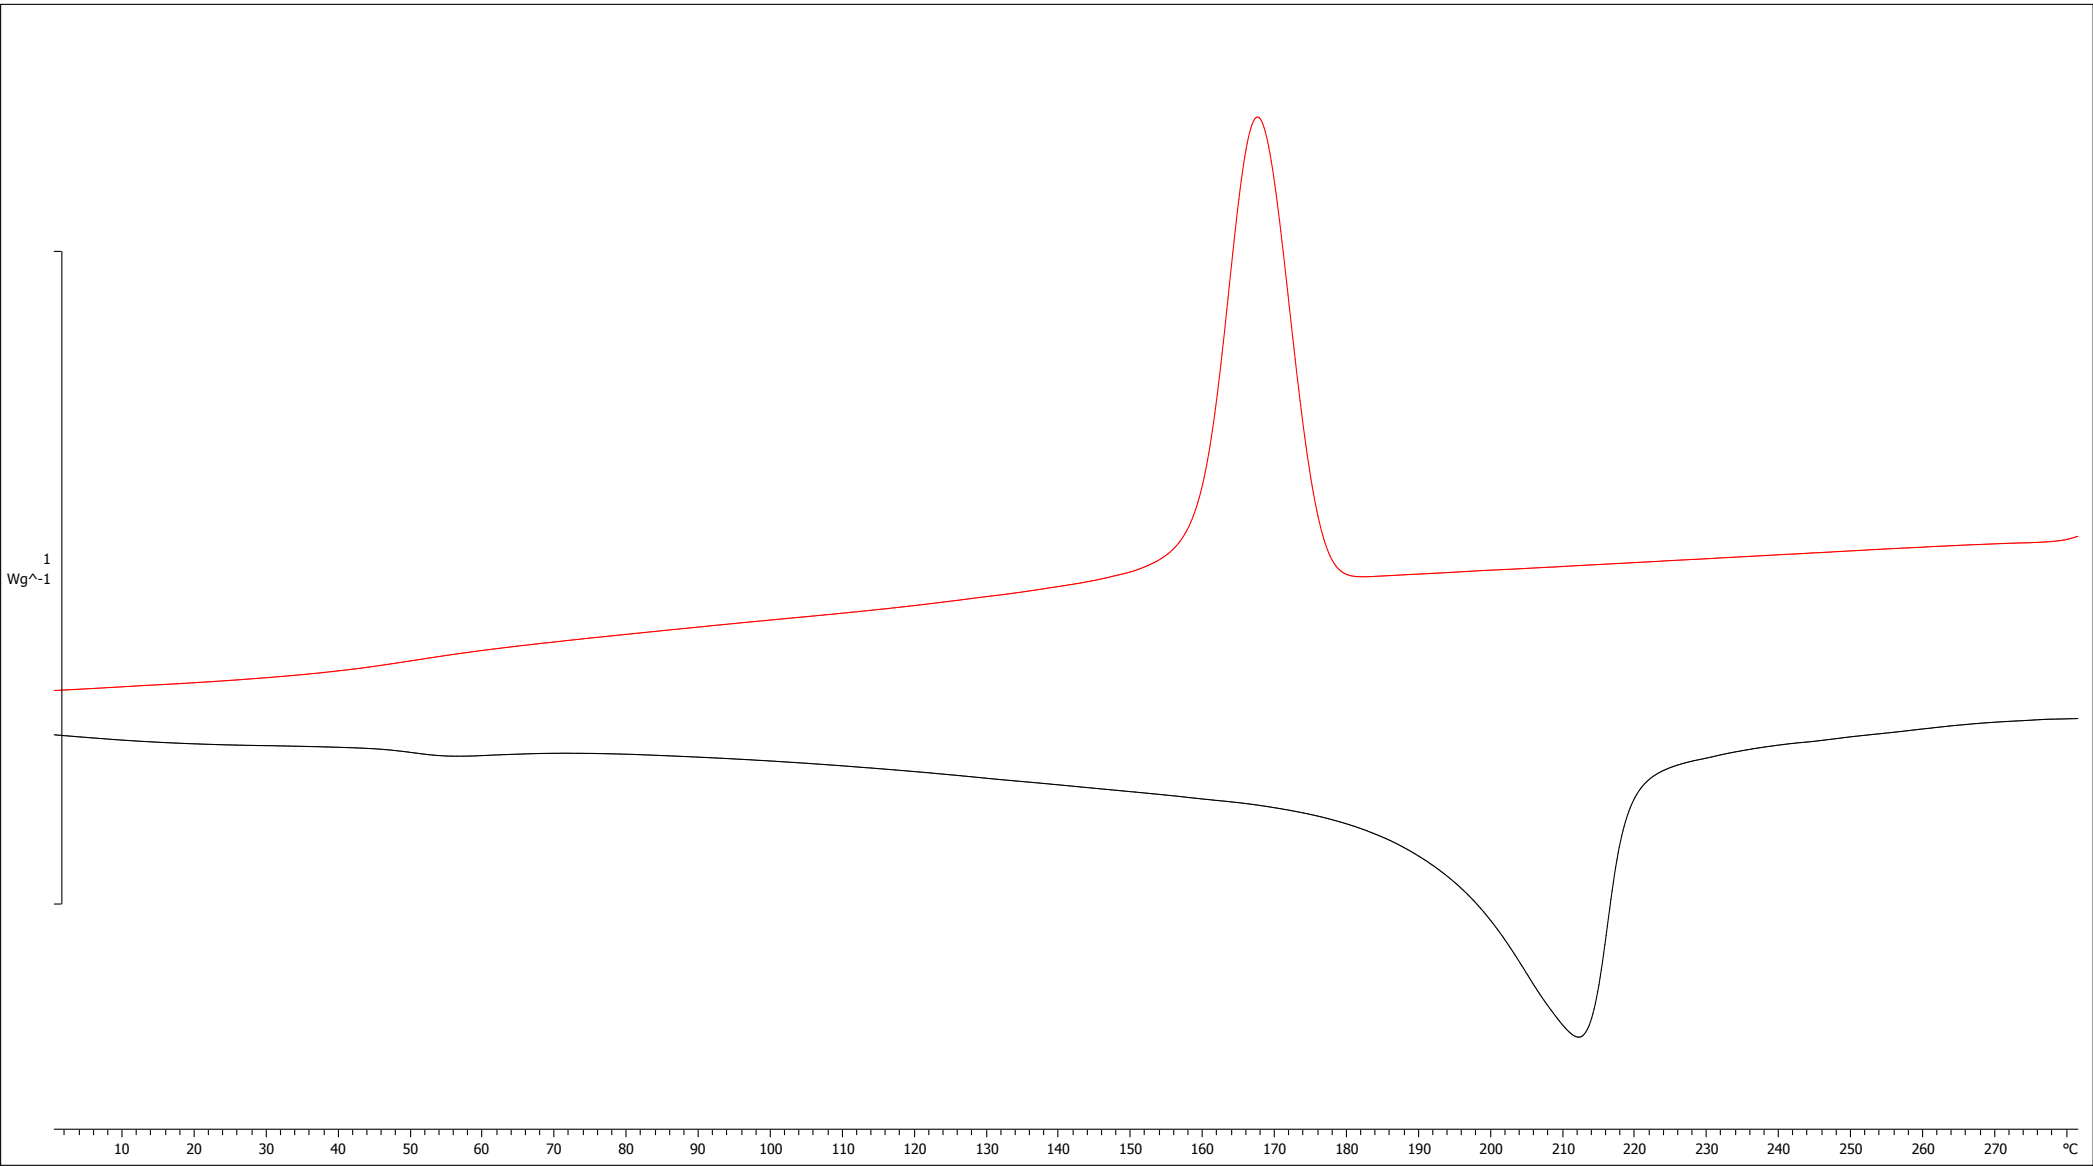

Supplement: s1 [file s1]
